# Supplementary material for: A cross‐sectional study of α‐synuclein seed amplification assay in Alzheimer's disease neuroimaging initiative: Prevalence and associations with Alzheimer's disease biomarkers and cognitive function
Source: PubMed Central journal article supplement — Alzheimers Dement. 2024 May 21;20(8):5114–31. doi: 10.1002/alz.13858 (PMC11350010; doi:10.1002/alz.13858), 2024-05-21
Supplement: ALZ-20-5114-s002.pdf [file ALZ-20-5114-s002.pdf]

## ICMJE DISCLOSURE FORM

Date: March 17, 2024

Your Name: Leslie M Shaw

Manuscript Title: A Cross-sectional Study of  $\alpha$ -Synuclein Seed Amplification Assay in Alzheimer's Disease Neuroimaging Initiative: Prevalence and Associations with Alzheimer's Disease Biomarkers and Cognitive Function

Manuscript number (if known): \_\_\_\_\_

In the interest of transparency, we ask you to disclose all relationships/activities/interests listed below that are related to the content of your manuscript. "Related" means any relation with for-profit or not-for-profit third parties whose interests may be affected by the content of the manuscript. Disclosure represents a commitment to transparency and does not necessarily indicate a bias. If you are in doubt about whether to list a relationship/activity/interest, it is preferable that you do so.

The following questions apply to the author's relationships/activities/interests as they relate to the **current manuscript only**.

The author's relationships/activities/interests should be **defined broadly**. For example, if your manuscript pertains to the epidemiology of hypertension, you should declare all relationships with manufacturers of antihypertensive medication, even if that medication is not mentioned in the manuscript.

In item #1 below, report all support for the work reported in this manuscript without time limit. For all other items, the time frame for disclosure is the past 36 months.

|                                                           |                                                                                                                                                                                | Name all entities with whom you have this relationship or indicate none (add rows as needed) | Specifications/Comments (e.g., if payments were made to you or to your institution) |
|-----------------------------------------------------------|--------------------------------------------------------------------------------------------------------------------------------------------------------------------------------|----------------------------------------------------------------------------------------------|-------------------------------------------------------------------------------------|
| <b>Time frame: Since the initial planning of the work</b> |                                                                                                                                                                                |                                                                                              |                                                                                     |
| 1                                                         | All support for the present manuscript (e.g., funding, provision of study materials, medical writing, article processing charges, etc.)<br><b>No time limit for this item.</b> | <u>  X  </u> None                                                                            |                                                                                     |
|                                                           |                                                                                                                                                                                |                                                                                              |                                                                                     |
|                                                           |                                                                                                                                                                                |                                                                                              |                                                                                     |
|                                                           |                                                                                                                                                                                |                                                                                              |                                                                                     |
|                                                           |                                                                                                                                                                                |                                                                                              |                                                                                     |
|                                                           |                                                                                                                                                                                |                                                                                              |                                                                                     |
|                                                           |                                                                                                                                                                                |                                                                                              |                                                                                     |
| <b>Time frame: past 36 months</b>                         |                                                                                                                                                                                |                                                                                              |                                                                                     |
| 2                                                         | Grants or contracts from any entity (if not indicated in item #1 above).                                                                                                       | NIA/NIH: P30<br>AG072979; U19<br>AG024904; R01<br>AG067505                                   |                                                                                     |

|    |                                                                                                              |                                                     |  |
|----|--------------------------------------------------------------------------------------------------------------|-----------------------------------------------------|--|
|    |                                                                                                              | DOD:<br>W81XWH2211081-B                             |  |
|    |                                                                                                              | FNIH Plasma Abeta<br>project                        |  |
| 3  | Royalties or licenses                                                                                        | <input checked="" type="checkbox"/> None            |  |
|    |                                                                                                              |                                                     |  |
| 4  | Consulting fees                                                                                              | Biogen; Roche;                                      |  |
|    |                                                                                                              |                                                     |  |
| 5  | Payment or honoraria for lectures, presentations, speakers bureaus, manuscript writing or educational events | Biogen                                              |  |
|    |                                                                                                              |                                                     |  |
| 6  | Payment for expert testimony                                                                                 | <input checked="" type="checkbox"/> None            |  |
|    |                                                                                                              |                                                     |  |
| 7  | Support for attending meetings and/or travel                                                                 | <input checked="" type="checkbox"/> None            |  |
|    |                                                                                                              |                                                     |  |
| 8  | Patents planned, issued or pending                                                                           | <input checked="" type="checkbox"/> None            |  |
|    |                                                                                                              |                                                     |  |
| 9  | Participation on a Data Safety Monitoring Board or Advisory Board                                            | <input checked="" type="checkbox"/> None            |  |
|    |                                                                                                              |                                                     |  |
| 10 | Leadership or fiduciary role in other board, society, committee or advocacy group, paid or unpaid            | <input checked="" type="checkbox"/> None            |  |
|    |                                                                                                              |                                                     |  |
| 11 | Stock or stock options                                                                                       | <input checked="" type="checkbox"/> None            |  |
|    |                                                                                                              |                                                     |  |
| 12 | Receipt of equipment, materials, drugs, medical writing, gifts or other services                             | Fujirebio in-kind reagents/equipment<br>ADNI4 study |  |
|    |                                                                                                              | Roche in-kind reagents/equipment<br>ADNI4           |  |
|    |                                                                                                              |                                                     |  |
| 13 | Other financial or non-financial interests                                                                   | <input checked="" type="checkbox"/> None            |  |
|    |                                                                                                              |                                                     |  |

Please place an "X" next to the following statement to indicate your agreement:

X I certify that I have answered every question and have not altered the wording of any of the questions on this form.

## ICMJE DISCLOSURE FORM

**Date:** 12/14/2023

**Your Name:** Richard J. Perrin

**Manuscript Title:** A Cross-sectional Study of  $\alpha$ -Synuclein Seed Amplification Assay in Alzheimer's Disease Neuroimaging Initiative: Prevalence and Associations with Alzheimer's Disease Biomarkers and Cognitive Function

**Manuscript Number (if known):** [Click or tap here to enter text.](#)

In the interest of transparency, we ask you to disclose all relationships/activities/interests listed below that are related to the content of your manuscript. "Related" means any relation with for-profit or not-for-profit third parties whose interests may be affected by the content of the manuscript. Disclosure represents a commitment to transparency and does not necessarily indicate a bias. If you are in doubt about whether to list a relationship/activity/interest, it is preferable that you do so.

The author's relationships/activities/interests should be defined broadly. For example, if your manuscript pertains to the epidemiology of hypertension, you should declare all relationships with manufacturers of antihypertensive medication, even if that medication is not mentioned in the manuscript.

In item #1 below, report all support for the work reported in this manuscript without time limit. For all other items, the time frame for disclosure is the past 36 months.

|                                                           |                                                                                                                                                                                | Name all entities with whom you have this relationship or indicate none (add rows as needed)                                                                                                                                                                                                                                                                                                                                                                                                                                                                                                                                                                                                                                                                             | Specifications/Comments (e.g., if payments were made to you or to your institution) |
|-----------------------------------------------------------|--------------------------------------------------------------------------------------------------------------------------------------------------------------------------------|--------------------------------------------------------------------------------------------------------------------------------------------------------------------------------------------------------------------------------------------------------------------------------------------------------------------------------------------------------------------------------------------------------------------------------------------------------------------------------------------------------------------------------------------------------------------------------------------------------------------------------------------------------------------------------------------------------------------------------------------------------------------------|-------------------------------------------------------------------------------------|
| <b>Time frame: Since the initial planning of the work</b> |                                                                                                                                                                                |                                                                                                                                                                                                                                                                                                                                                                                                                                                                                                                                                                                                                                                                                                                                                                          |                                                                                     |
| <b>1</b>                                                  | All support for the present manuscript (e.g., funding, provision of study materials, medical writing, article processing charges, etc.)<br><b>No time limit for this item.</b> | <input type="checkbox"/> None<br><input type="checkbox"/> U19AG024904 (Weiner) 09/2022-07/2027                                                                                                                                                                                                                                                                                                                                                                                                                                                                                                                                                                                                                                                                           | Institution                                                                         |
| <b>Time frame: past 36 months</b>                         |                                                                                                                                                                                |                                                                                                                                                                                                                                                                                                                                                                                                                                                                                                                                                                                                                                                                                                                                                                          |                                                                                     |
| <b>2</b>                                                  | Grants or contracts from any entity (if not indicated in item #1 above).                                                                                                       | <input type="checkbox"/> None<br><input type="checkbox"/> P01 AG003991 (Morris) 05/01/19-04/30/24<br><input type="checkbox"/> P30 AG066444 (Morris) 05/01/20-04/30/25<br><input type="checkbox"/> R01AG054567 (Benzinger)09/15/17-06/30/22<br><input type="checkbox"/> R01 AG052550 (Benzinger)04/15/18-01/31/23<br><input type="checkbox"/> R01 AG070883 (Kind, Raji)03/01/21-02/28/26<br><input type="checkbox"/> R01NS092865 (Xu) 02/01/16-11/30/21<br><input type="checkbox"/> R01AG054513(Yablonskiy)07/01/17-04/30/22<br><input type="checkbox"/> R01 NS075321(Perlmutter)05/01/11-04/30/22 NCE APDA (Perlmutter) 01/01/99-08/2023<br><input type="checkbox"/> R01NS097799 (Kotzbauer)07/2022-06/2027<br><input type="checkbox"/> U19AG069701 (Bu) 06/2021-05/2026 | All to Institution                                                                  |
|                                                           |                                                                                                                                                                                | <input type="checkbox"/> U19NS110456 (Perlmutter) 09/2019-06/2024<br><input type="checkbox"/> R01AG058676 (Masters) 09/2018-05/2024 NCE<br><input type="checkbox"/> R01AG074909 (Q Wang) 04/2022-01/2027<br><input type="checkbox"/> U19AG07879 (Ertekin-Taner) 03/2023-02/2027<br><input type="checkbox"/> U19 AG032438 (Bateman) 09/15/19-06/30/24<br><input type="checkbox"/> U19AG032438-09S1 (Bateman) 09/2019-06/2024<br><input type="checkbox"/> R01AG068319 (Bateman) 09/15/20-05/31/25<br><input type="checkbox"/> R01 AG053267 (Bateman) 09/01/17-05/31/22                                                                                                                                                                                                     | All to institution                                                                  |

|    |                                                                                                              | Name all entities with whom you have this relationship or indicate none (add rows as needed)                                                                                                                                                                                                                         | Specifications/Comments (e.g., if payments were made to you or to your institution) |  |  |  |  |  |  |
|----|--------------------------------------------------------------------------------------------------------------|----------------------------------------------------------------------------------------------------------------------------------------------------------------------------------------------------------------------------------------------------------------------------------------------------------------------|-------------------------------------------------------------------------------------|--|--|--|--|--|--|
| 3  | Royalties or licenses                                                                                        | <input checked="" type="checkbox"/> <b>None</b><br><table border="1" style="width: 100%; border-collapse: collapse;"> <tr><td style="width: 70%; height: 15px;"></td><td style="width: 30%;"></td></tr> <tr><td style="height: 15px;"></td><td></td></tr> <tr><td style="height: 15px;"></td><td></td></tr> </table> |                                                                                     |  |  |  |  |  |  |
|    |                                                                                                              |                                                                                                                                                                                                                                                                                                                      |                                                                                     |  |  |  |  |  |  |
|    |                                                                                                              |                                                                                                                                                                                                                                                                                                                      |                                                                                     |  |  |  |  |  |  |
|    |                                                                                                              |                                                                                                                                                                                                                                                                                                                      |                                                                                     |  |  |  |  |  |  |
| 4  | Consulting fees                                                                                              | <input checked="" type="checkbox"/> <b>None</b><br><table border="1" style="width: 100%; border-collapse: collapse;"> <tr><td style="width: 70%; height: 15px;"></td><td style="width: 30%;"></td></tr> <tr><td style="height: 15px;"></td><td></td></tr> <tr><td style="height: 15px;"></td><td></td></tr> </table> |                                                                                     |  |  |  |  |  |  |
|    |                                                                                                              |                                                                                                                                                                                                                                                                                                                      |                                                                                     |  |  |  |  |  |  |
|    |                                                                                                              |                                                                                                                                                                                                                                                                                                                      |                                                                                     |  |  |  |  |  |  |
|    |                                                                                                              |                                                                                                                                                                                                                                                                                                                      |                                                                                     |  |  |  |  |  |  |
| 5  | Payment or honoraria for lectures, presentations, speakers bureaus, manuscript writing or educational events | <input checked="" type="checkbox"/> <b>None</b><br><table border="1" style="width: 100%; border-collapse: collapse;"> <tr><td style="width: 70%; height: 15px;"></td><td style="width: 30%;"></td></tr> <tr><td style="height: 15px;"></td><td></td></tr> <tr><td style="height: 15px;"></td><td></td></tr> </table> |                                                                                     |  |  |  |  |  |  |
|    |                                                                                                              |                                                                                                                                                                                                                                                                                                                      |                                                                                     |  |  |  |  |  |  |
|    |                                                                                                              |                                                                                                                                                                                                                                                                                                                      |                                                                                     |  |  |  |  |  |  |
|    |                                                                                                              |                                                                                                                                                                                                                                                                                                                      |                                                                                     |  |  |  |  |  |  |
| 6  | Payment for expert testimony                                                                                 | <input checked="" type="checkbox"/> <b>None</b><br><table border="1" style="width: 100%; border-collapse: collapse;"> <tr><td style="width: 70%; height: 15px;"></td><td style="width: 30%;"></td></tr> <tr><td style="height: 15px;"></td><td></td></tr> <tr><td style="height: 15px;"></td><td></td></tr> </table> |                                                                                     |  |  |  |  |  |  |
|    |                                                                                                              |                                                                                                                                                                                                                                                                                                                      |                                                                                     |  |  |  |  |  |  |
|    |                                                                                                              |                                                                                                                                                                                                                                                                                                                      |                                                                                     |  |  |  |  |  |  |
|    |                                                                                                              |                                                                                                                                                                                                                                                                                                                      |                                                                                     |  |  |  |  |  |  |
| 7  | Support for attending meetings and/or travel                                                                 | <input checked="" type="checkbox"/> <b>None</b><br><table border="1" style="width: 100%; border-collapse: collapse;"> <tr><td style="width: 70%; height: 15px;"></td><td style="width: 30%;"></td></tr> <tr><td style="height: 15px;"></td><td></td></tr> <tr><td style="height: 15px;"></td><td></td></tr> </table> |                                                                                     |  |  |  |  |  |  |
|    |                                                                                                              |                                                                                                                                                                                                                                                                                                                      |                                                                                     |  |  |  |  |  |  |
|    |                                                                                                              |                                                                                                                                                                                                                                                                                                                      |                                                                                     |  |  |  |  |  |  |
|    |                                                                                                              |                                                                                                                                                                                                                                                                                                                      |                                                                                     |  |  |  |  |  |  |
| 8  | Patents planned, issued or pending                                                                           | <input checked="" type="checkbox"/> <b>None</b><br><table border="1" style="width: 100%; border-collapse: collapse;"> <tr><td style="width: 70%; height: 15px;"></td><td style="width: 30%;"></td></tr> <tr><td style="height: 15px;"></td><td></td></tr> <tr><td style="height: 15px;"></td><td></td></tr> </table> |                                                                                     |  |  |  |  |  |  |
|    |                                                                                                              |                                                                                                                                                                                                                                                                                                                      |                                                                                     |  |  |  |  |  |  |
|    |                                                                                                              |                                                                                                                                                                                                                                                                                                                      |                                                                                     |  |  |  |  |  |  |
|    |                                                                                                              |                                                                                                                                                                                                                                                                                                                      |                                                                                     |  |  |  |  |  |  |
| 9  | Participation on a Data Safety Monitoring Board or Advisory Board                                            | <input checked="" type="checkbox"/> <b>None</b><br><table border="1" style="width: 100%; border-collapse: collapse;"> <tr><td style="width: 70%; height: 15px;"></td><td style="width: 30%;"></td></tr> <tr><td style="height: 15px;"></td><td></td></tr> <tr><td style="height: 15px;"></td><td></td></tr> </table> |                                                                                     |  |  |  |  |  |  |
|    |                                                                                                              |                                                                                                                                                                                                                                                                                                                      |                                                                                     |  |  |  |  |  |  |
|    |                                                                                                              |                                                                                                                                                                                                                                                                                                                      |                                                                                     |  |  |  |  |  |  |
|    |                                                                                                              |                                                                                                                                                                                                                                                                                                                      |                                                                                     |  |  |  |  |  |  |
| 10 | Leadership or fiduciary role in other board, society, committee or advocacy group, paid or unpaid            | <input checked="" type="checkbox"/> <b>None</b><br><table border="1" style="width: 100%; border-collapse: collapse;"> <tr><td style="width: 70%; height: 15px;"></td><td style="width: 30%;"></td></tr> <tr><td style="height: 15px;"></td><td></td></tr> <tr><td style="height: 15px;"></td><td></td></tr> </table> |                                                                                     |  |  |  |  |  |  |
|    |                                                                                                              |                                                                                                                                                                                                                                                                                                                      |                                                                                     |  |  |  |  |  |  |
|    |                                                                                                              |                                                                                                                                                                                                                                                                                                                      |                                                                                     |  |  |  |  |  |  |
|    |                                                                                                              |                                                                                                                                                                                                                                                                                                                      |                                                                                     |  |  |  |  |  |  |

|    |                                                                                  | Name all entities with whom you have this relationship or indicate none (add rows as needed) | Specifications/Comments (e.g., if payments were made to you or to your institution) |
|----|----------------------------------------------------------------------------------|----------------------------------------------------------------------------------------------|-------------------------------------------------------------------------------------|
| 11 | Stock or stock options                                                           | <input checked="" type="checkbox"/> None                                                     |                                                                                     |
|    |                                                                                  |                                                                                              |                                                                                     |
|    |                                                                                  |                                                                                              |                                                                                     |
|    |                                                                                  |                                                                                              |                                                                                     |
| 12 | Receipt of equipment, materials, drugs, medical writing, gifts or other services | <input checked="" type="checkbox"/> None                                                     |                                                                                     |
|    |                                                                                  |                                                                                              |                                                                                     |
|    |                                                                                  |                                                                                              |                                                                                     |
|    |                                                                                  |                                                                                              |                                                                                     |
| 13 | Other financial or non-financial interests                                       | <input checked="" type="checkbox"/> None                                                     |                                                                                     |
|    |                                                                                  |                                                                                              |                                                                                     |
|    |                                                                                  |                                                                                              |                                                                                     |
|    |                                                                                  |                                                                                              |                                                                                     |

Please place an "X" next to the following statement to indicate your agreement:

I certify that I have answered every question and have not altered the wording of any of the questions on this form.

## ICMJE DISCLOSURE FORM

**Date:** 03/17/2024

**Your Name:** Andrew Saykin

**Manuscript Title:** A Cross-sectional Study of  $\alpha$ -Synuclein Seed Amplification Assay in Alzheimer's Disease Neuroimaging Initiative: Prevalence and Associations with Alzheimer's Disease Biomarkers and Cognitive Function

**Manuscript Number (if known):** [Click or tap here to enter text.](#)

In the interest of transparency, we ask you to disclose all relationships/activities/interests listed below that are related to the content of your manuscript. "Related" means any relation with for-profit or not-for-profit third parties whose interests may be affected by the content of the manuscript. Disclosure represents a commitment to transparency and does not necessarily indicate a bias. If you are in doubt about whether to list a relationship/activity/interest, it is preferable that you do so.

The author's relationships/activities/interests should be defined broadly. For example, if your manuscript pertains to the epidemiology of hypertension, you should declare all relationships with manufacturers of antihypertensive medication, even if that medication is not mentioned in the manuscript.

In item #1 below, report all support for the work reported in this manuscript without time limit. For all other items, the time frame for disclosure is the past 36 months.

|                                                    | Name all entities with whom you have this relationship or indicate none (add rows as needed)                                                                                   | Specifications/Comments (e.g., if payments were made to you or to your institution)                                                                                                                                                                                                                                                                                                                                                                                                  |  |  |  |  |  |  |  |  |
|----------------------------------------------------|--------------------------------------------------------------------------------------------------------------------------------------------------------------------------------|--------------------------------------------------------------------------------------------------------------------------------------------------------------------------------------------------------------------------------------------------------------------------------------------------------------------------------------------------------------------------------------------------------------------------------------------------------------------------------------|--|--|--|--|--|--|--|--|
| Time frame: Since the initial planning of the work |                                                                                                                                                                                |                                                                                                                                                                                                                                                                                                                                                                                                                                                                                      |  |  |  |  |  |  |  |  |
| <b>1</b>                                           | All support for the present manuscript (e.g., funding, provision of study materials, medical writing, article processing charges, etc.)<br><b>No time limit for this item.</b> | <input type="checkbox"/> None<br><br><div style="border: 1px solid black; padding: 5px; min-height: 100px;"> <p>Dr. Saykin receives support from multiple NIH grants (P30 AG010133, P30 AG072976, R01 AG019771, R01 AG057739, U19 AG024904, R01 LM013463, R01 AG068193, T32 AG071444, U01 AG068057, U01 AG072177, and U19 AG074879).</p> </div> <div style="text-align: right; font-size: small; margin-top: 5px;"> <a href="#">Click the tab key to add additional rows.</a> </div> |  |  |  |  |  |  |  |  |
| Time frame: past 36 months                         |                                                                                                                                                                                |                                                                                                                                                                                                                                                                                                                                                                                                                                                                                      |  |  |  |  |  |  |  |  |
| <b>2</b>                                           | Grants or contracts from any entity (if not indicated in item #1 above).                                                                                                       | <input checked="" type="checkbox"/> None<br><br><table border="1" style="width: 100%; height: 100%; border-collapse: collapse;"> <tr><td style="width: 50%; height: 20px;"></td><td style="width: 50%;"></td></tr> <tr><td style="height: 20px;"></td><td></td></tr> <tr><td style="height: 20px;"></td><td></td></tr> <tr><td style="height: 20px;"></td><td></td></tr> </table>                                                                                                    |  |  |  |  |  |  |  |  |
|                                                    |                                                                                                                                                                                |                                                                                                                                                                                                                                                                                                                                                                                                                                                                                      |  |  |  |  |  |  |  |  |
|                                                    |                                                                                                                                                                                |                                                                                                                                                                                                                                                                                                                                                                                                                                                                                      |  |  |  |  |  |  |  |  |
|                                                    |                                                                                                                                                                                |                                                                                                                                                                                                                                                                                                                                                                                                                                                                                      |  |  |  |  |  |  |  |  |
|                                                    |                                                                                                                                                                                |                                                                                                                                                                                                                                                                                                                                                                                                                                                                                      |  |  |  |  |  |  |  |  |

|          |                                                                                                              | Name all entities with whom you have this relationship or indicate none (add rows as needed)                                                                                                                                                                                                                         | Specifications/Comments (e.g., if payments were made to you or to your institution) |  |  |  |  |  |  |
|----------|--------------------------------------------------------------------------------------------------------------|----------------------------------------------------------------------------------------------------------------------------------------------------------------------------------------------------------------------------------------------------------------------------------------------------------------------|-------------------------------------------------------------------------------------|--|--|--|--|--|--|
| <b>3</b> | Royalties or licenses                                                                                        | <input checked="" type="checkbox"/> <b>None</b><br><table border="1" style="width: 100%; border-collapse: collapse;"> <tr><td style="width: 50%; height: 20px;"></td><td style="width: 50%;"></td></tr> <tr><td style="height: 20px;"></td><td></td></tr> <tr><td style="height: 20px;"></td><td></td></tr> </table> |                                                                                     |  |  |  |  |  |  |
|          |                                                                                                              |                                                                                                                                                                                                                                                                                                                      |                                                                                     |  |  |  |  |  |  |
|          |                                                                                                              |                                                                                                                                                                                                                                                                                                                      |                                                                                     |  |  |  |  |  |  |
|          |                                                                                                              |                                                                                                                                                                                                                                                                                                                      |                                                                                     |  |  |  |  |  |  |
| <b>4</b> | Consulting fees                                                                                              | <input checked="" type="checkbox"/> <b>None</b><br><table border="1" style="width: 100%; border-collapse: collapse;"> <tr><td style="width: 50%; height: 20px;"></td><td style="width: 50%;"></td></tr> <tr><td style="height: 20px;"></td><td></td></tr> <tr><td style="height: 20px;"></td><td></td></tr> </table> |                                                                                     |  |  |  |  |  |  |
|          |                                                                                                              |                                                                                                                                                                                                                                                                                                                      |                                                                                     |  |  |  |  |  |  |
|          |                                                                                                              |                                                                                                                                                                                                                                                                                                                      |                                                                                     |  |  |  |  |  |  |
|          |                                                                                                              |                                                                                                                                                                                                                                                                                                                      |                                                                                     |  |  |  |  |  |  |
| <b>5</b> | Payment or honoraria for lectures, presentations, speakers bureaus, manuscript writing or educational events | <input checked="" type="checkbox"/> <b>None</b><br><table border="1" style="width: 100%; border-collapse: collapse;"> <tr><td style="width: 50%; height: 20px;"></td><td style="width: 50%;"></td></tr> <tr><td style="height: 20px;"></td><td></td></tr> <tr><td style="height: 20px;"></td><td></td></tr> </table> |                                                                                     |  |  |  |  |  |  |
|          |                                                                                                              |                                                                                                                                                                                                                                                                                                                      |                                                                                     |  |  |  |  |  |  |
|          |                                                                                                              |                                                                                                                                                                                                                                                                                                                      |                                                                                     |  |  |  |  |  |  |
|          |                                                                                                              |                                                                                                                                                                                                                                                                                                                      |                                                                                     |  |  |  |  |  |  |
| <b>6</b> | Payment for expert testimony                                                                                 | <input checked="" type="checkbox"/> <b>None</b><br><table border="1" style="width: 100%; border-collapse: collapse;"> <tr><td style="width: 50%; height: 20px;"></td><td style="width: 50%;"></td></tr> <tr><td style="height: 20px;"></td><td></td></tr> <tr><td style="height: 20px;"></td><td></td></tr> </table> |                                                                                     |  |  |  |  |  |  |
|          |                                                                                                              |                                                                                                                                                                                                                                                                                                                      |                                                                                     |  |  |  |  |  |  |
|          |                                                                                                              |                                                                                                                                                                                                                                                                                                                      |                                                                                     |  |  |  |  |  |  |
|          |                                                                                                              |                                                                                                                                                                                                                                                                                                                      |                                                                                     |  |  |  |  |  |  |
| <b>7</b> | Support for attending meetings and/or travel                                                                 | <input checked="" type="checkbox"/> <b>None</b><br><table border="1" style="width: 100%; border-collapse: collapse;"> <tr><td style="width: 50%; height: 20px;"></td><td style="width: 50%;"></td></tr> <tr><td style="height: 20px;"></td><td></td></tr> <tr><td style="height: 20px;"></td><td></td></tr> </table> |                                                                                     |  |  |  |  |  |  |
|          |                                                                                                              |                                                                                                                                                                                                                                                                                                                      |                                                                                     |  |  |  |  |  |  |
|          |                                                                                                              |                                                                                                                                                                                                                                                                                                                      |                                                                                     |  |  |  |  |  |  |
|          |                                                                                                              |                                                                                                                                                                                                                                                                                                                      |                                                                                     |  |  |  |  |  |  |
| <b>8</b> | Patents planned, issued or pending                                                                           | <input checked="" type="checkbox"/> <b>None</b><br><table border="1" style="width: 100%; border-collapse: collapse;"> <tr><td style="width: 50%; height: 20px;"></td><td style="width: 50%;"></td></tr> <tr><td style="height: 20px;"></td><td></td></tr> <tr><td style="height: 20px;"></td><td></td></tr> </table> |                                                                                     |  |  |  |  |  |  |
|          |                                                                                                              |                                                                                                                                                                                                                                                                                                                      |                                                                                     |  |  |  |  |  |  |
|          |                                                                                                              |                                                                                                                                                                                                                                                                                                                      |                                                                                     |  |  |  |  |  |  |
|          |                                                                                                              |                                                                                                                                                                                                                                                                                                                      |                                                                                     |  |  |  |  |  |  |



|           |                                                                                                   |                                                                                                      |                                                                             |
|-----------|---------------------------------------------------------------------------------------------------|------------------------------------------------------------------------------------------------------|-----------------------------------------------------------------------------|
| <b>9</b>  | Participation on a Data Safety Monitoring Board or Advisory Board                                 | <input type="checkbox"/> <b>None</b>                                                                 |                                                                             |
|           |                                                                                                   | Siemens Medical Solutions USA, Inc. (Dementia Advisory Board)                                        | NIH NHLBI (MESA Observational Study Monitoring Board)                       |
|           |                                                                                                   | Eisai (Scientific Advisory Board)<br>Novo Nordisk (Scientific Advisory Board)                        | NIH/NIA: External Advisory Committees, Multiple NIH-funded centers/programs |
|           |                                                                                                   |                                                                                                      |                                                                             |
| <b>10</b> | Leadership or fiduciary role in other board, society, committee or advocacy group, paid or unpaid | <input checked="" type="checkbox"/> <b>None</b>                                                      |                                                                             |
|           |                                                                                                   |                                                                                                      |                                                                             |
|           |                                                                                                   |                                                                                                      |                                                                             |
|           |                                                                                                   |                                                                                                      |                                                                             |
| <b>11</b> | Stock or stock options                                                                            | <input checked="" type="checkbox"/> <b>None</b>                                                      |                                                                             |
|           |                                                                                                   |                                                                                                      |                                                                             |
|           |                                                                                                   |                                                                                                      |                                                                             |
|           |                                                                                                   |                                                                                                      |                                                                             |
| <b>12</b> | Receipt of equipment, materials, drugs, medical writing, gifts or other services                  | <input type="checkbox"/> <b>None</b>                                                                 |                                                                             |
|           |                                                                                                   | Avid Radiopharmaceuticals, a subsidiary of Eli Lilly (in kind contribution of PET tracer precursor)  |                                                                             |
|           |                                                                                                   |                                                                                                      |                                                                             |
|           |                                                                                                   |                                                                                                      |                                                                             |
| <b>13</b> | Other financial or non-financial interests                                                        | <input type="checkbox"/> <b>None</b>                                                                 |                                                                             |
|           |                                                                                                   | Springer-Nature Publishing (Editorial Office Support as Editor-in-Chief, Brain Imaging and Behavior) |                                                                             |
|           |                                                                                                   |                                                                                                      |                                                                             |
|           |                                                                                                   |                                                                                                      |                                                                             |

Please place an "X" next to the following statement to indicate your agreement:

I certify that I have answered every question and have not altered the wording of any of the questions on this form.

## ICMJE DISCLOSURE FORM

Date: \_\_\_\_\_ November 20, 2023 \_\_\_\_\_

Your Name: \_\_\_\_\_ Sean McEvoy \_\_\_\_\_

Manuscript Title: \_\_\_\_\_ A Cross-sectional Study of  $\alpha$ -Synuclein Seed Amplification Assay in Alzheimer's Disease  
 Neuroimaging Initiative: Prevalence and Associations with Alzheimer's Disease Biomarkers and Cognitive Function \_\_\_\_\_

Manuscript number (if known): \_\_\_\_\_

In the interest of transparency, we ask you to disclose all relationships/activities/interests listed below that are related to the content of your manuscript. "Related" means any relation with for-profit or not-for-profit third parties whose interests may be affected by the content of the manuscript. Disclosure represents a commitment to transparency and does not necessarily indicate a bias. If you are in doubt about whether to list a relationship/activity/interest, it is preferable that you do so.

The following questions apply to the author's relationships/activities/interests as they relate to the current manuscript only.

The author's relationships/activities/interests should be defined broadly. For example, if your manuscript pertains to the epidemiology of hypertension, you should declare all relationships with manufacturers of antihypertensive medication, even if that medication is not mentioned in the manuscript.

In item #1 below, report all support for the work reported in this manuscript without time limit. For all other items, the time frame for disclosure is the past 36 months.

|                                                           |                                                                                                                                                                                | Name all entities with whom you have this relationship or indicate none (add rows as needed) | Specifications/Comments (e.g., if payments were made to you or to your institution)                                                                                                                          |
|-----------------------------------------------------------|--------------------------------------------------------------------------------------------------------------------------------------------------------------------------------|----------------------------------------------------------------------------------------------|--------------------------------------------------------------------------------------------------------------------------------------------------------------------------------------------------------------|
| <b>Time frame: Since the initial planning of the work</b> |                                                                                                                                                                                |                                                                                              |                                                                                                                                                                                                              |
| 1                                                         | All support for the present manuscript (e.g., funding, provision of study materials, medical writing, article processing charges, etc.)<br><b>No time limit for this item.</b> | Amprion Inc.                                                                                 | SM is an employee of Amprion. Amprion supported SAA analysis of CSF from all autopsy specimens for this study. The samples were blinded and coded by ADNI before being sent to Amprion.                      |
|                                                           |                                                                                                                                                                                | NIH/CARD                                                                                     | SAA analysis of CSF from non-autopsy ADNI samples was generously supported by NIH- Center for Alzheimer's and Related Dementias (CARD). Samples were blinded and coded by ADNI before being sent to Amprion. |
|                                                           |                                                                                                                                                                                |                                                                                              |                                                                                                                                                                                                              |
|                                                           |                                                                                                                                                                                |                                                                                              |                                                                                                                                                                                                              |
|                                                           |                                                                                                                                                                                |                                                                                              |                                                                                                                                                                                                              |
|                                                           |                                                                                                                                                                                |                                                                                              |                                                                                                                                                                                                              |
| <b>Time frame: past 36 months</b>                         |                                                                                                                                                                                |                                                                                              |                                                                                                                                                                                                              |
| 2                                                         |                                                                                                                                                                                | <input checked="" type="checkbox"/> X None                                                   | See above                                                                                                                                                                                                    |

|    |                                                                                                              |                                               |                                                                                                                    |
|----|--------------------------------------------------------------------------------------------------------------|-----------------------------------------------|--------------------------------------------------------------------------------------------------------------------|
|    | Grants or contracts from any entity (if not indicated in item #1 above).                                     |                                               |                                                                                                                    |
| 3  | Royalties or licenses                                                                                        | <input checked="" type="checkbox"/> None      |                                                                                                                    |
| 4  | Consulting fees                                                                                              | <input checked="" type="checkbox"/> None      |                                                                                                                    |
| 5  | Payment or honoraria for lectures, presentations, speakers bureaus, manuscript writing or educational events | <input checked="" type="checkbox"/> None      |                                                                                                                    |
| 6  | Payment for expert testimony                                                                                 | <input checked="" type="checkbox"/> None      |                                                                                                                    |
| 7  | Support for attending meetings and/or travel                                                                 | <input checked="" type="checkbox"/> None      |                                                                                                                    |
| 8  | Patents planned, issued or pending                                                                           | <input checked="" type="checkbox"/> None      |                                                                                                                    |
| 9  | Participation on a Data Safety Monitoring Board or Advisory Board                                            | <input checked="" type="checkbox"/> None      |                                                                                                                    |
| 10 | Leadership or fiduciary role in other board, society, committee or advocacy group, paid or unpaid            | <input checked="" type="checkbox"/> None      |                                                                                                                    |
| 11 | Stock or stock options                                                                                       | <input type="checkbox"/> None<br>Amprion inc. | SM is an employee of Amprion and is therefore eligible for employee stock options associated with this employment. |
| 12 | Receipt of equipment, materials, drugs, medical writing, gifts or other services                             | <input checked="" type="checkbox"/> None      |                                                                                                                    |
| 13 | Other financial or non-financial interests                                                                   | <input type="checkbox"/> None<br>Amprion Inc. | SM is an employee of Amprion                                                                                       |

Please place an "X" next to the following statement to indicate your agreement:

I certify that I have answered every question and have not altered the wording of any of the questions on this form.

## ICMJE DISCLOSURE FORM

**Date:** 12/13/2023

**Your Name:** Andrew Singleton

**Manuscript Title:** **A Cross-sectional Study of  $\alpha$ -Synuclein Seed Amplification Assay in Alzheimer's Disease Neuroimaging Initiative: Prevalence and Associations with Alzheimer's Disease Biomarkers and Cognitive Function**

**Manuscript Number (if known):** Click or tap here to enter text.

In the interest of transparency, we ask you to disclose all relationships/activities/interests listed below that are related to the content of your manuscript. "Related" means any relation with for-profit or not-for-profit third parties whose interests may be affected by the content of the manuscript. Disclosure represents a commitment to transparency and does not necessarily indicate a bias. If you are in doubt about whether to list a relationship/activity/interest, it is preferable that you do so.

The author's relationships/activities/interests should be defined broadly. For example, if your manuscript pertains to the epidemiology of hypertension, you should declare all relationships with manufacturers of antihypertensive medication, even if that medication is not mentioned in the manuscript.

In item #1 below, report all support for the work reported in this manuscript without time limit. For all other items, the time frame for disclosure is the past 36 months.

|                                                                  | Name all entities with whom you have this relationship or indicate none (add rows as needed)                                                                                   | Specifications/Comments (e.g., if payments were made to you or to your institution)                                                                                                                                                                                                                                                                                                                                                                                         |                                                                  |                             |  |                                                          |
|------------------------------------------------------------------|--------------------------------------------------------------------------------------------------------------------------------------------------------------------------------|-----------------------------------------------------------------------------------------------------------------------------------------------------------------------------------------------------------------------------------------------------------------------------------------------------------------------------------------------------------------------------------------------------------------------------------------------------------------------------|------------------------------------------------------------------|-----------------------------|--|----------------------------------------------------------|
| Time frame: Since the initial planning of the work               |                                                                                                                                                                                |                                                                                                                                                                                                                                                                                                                                                                                                                                                                             |                                                                  |                             |  |                                                          |
| <b>1</b>                                                         | All support for the present manuscript (e.g., funding, provision of study materials, medical writing, article processing charges, etc.)<br><b>No time limit for this item.</b> | <input type="checkbox"/> <b>None</b><br><br><table border="1" style="width: 100%; border-collapse: collapse;"> <tr> <td style="width: 50%; padding: 2px;">Intramural Research Program of the National Institutes of Health</td> <td style="width: 50%; padding: 2px;">Intramural Research Support</td> </tr> <tr> <td style="height: 20px;"></td> <td style="text-align: right; padding: 2px;"><small>Click the tab key to add additional rows.</small></td> </tr> </table> | Intramural Research Program of the National Institutes of Health | Intramural Research Support |  | <small>Click the tab key to add additional rows.</small> |
| Intramural Research Program of the National Institutes of Health | Intramural Research Support                                                                                                                                                    |                                                                                                                                                                                                                                                                                                                                                                                                                                                                             |                                                                  |                             |  |                                                          |
|                                                                  | <small>Click the tab key to add additional rows.</small>                                                                                                                       |                                                                                                                                                                                                                                                                                                                                                                                                                                                                             |                                                                  |                             |  |                                                          |
| Time frame: past 36 months                                       |                                                                                                                                                                                |                                                                                                                                                                                                                                                                                                                                                                                                                                                                             |                                                                  |                             |  |                                                          |
| <b>2</b>                                                         | Grants or contracts from any entity (if not indicated in item #1 above).                                                                                                       | <input checked="" type="checkbox"/> <b>None</b><br><br><table border="1" style="width: 100%; border-collapse: collapse;"> <tr><td style="width: 50%; height: 20px;"></td><td style="width: 50%;"></td></tr> <tr><td style="height: 20px;"></td><td></td></tr> </table>                                                                                                                                                                                                      |                                                                  |                             |  |                                                          |
|                                                                  |                                                                                                                                                                                |                                                                                                                                                                                                                                                                                                                                                                                                                                                                             |                                                                  |                             |  |                                                          |
|                                                                  |                                                                                                                                                                                |                                                                                                                                                                                                                                                                                                                                                                                                                                                                             |                                                                  |                             |  |                                                          |
| <b>3</b>                                                         | Royalties or licenses                                                                                                                                                          | <input checked="" type="checkbox"/> <b>None</b><br><br><table border="1" style="width: 100%; border-collapse: collapse;"> <tr><td style="width: 50%; height: 20px;"></td><td style="width: 50%;"></td></tr> <tr><td style="height: 20px;"></td><td></td></tr> </table>                                                                                                                                                                                                      |                                                                  |                             |  |                                                          |
|                                                                  |                                                                                                                                                                                |                                                                                                                                                                                                                                                                                                                                                                                                                                                                             |                                                                  |                             |  |                                                          |
|                                                                  |                                                                                                                                                                                |                                                                                                                                                                                                                                                                                                                                                                                                                                                                             |                                                                  |                             |  |                                                          |

|    |                                                                                                              | Name all entities with whom you have this relationship or indicate none (add rows as needed) | Specifications/Comments (e.g., if payments were made to you or to your institution) |
|----|--------------------------------------------------------------------------------------------------------------|----------------------------------------------------------------------------------------------|-------------------------------------------------------------------------------------|
| 4  | Consulting fees                                                                                              | <input checked="" type="checkbox"/> None                                                     |                                                                                     |
|    |                                                                                                              |                                                                                              |                                                                                     |
|    |                                                                                                              |                                                                                              |                                                                                     |
|    |                                                                                                              |                                                                                              |                                                                                     |
| 5  | Payment or honoraria for lectures, presentations, speakers bureaus, manuscript writing or educational events | <input type="checkbox"/> None                                                                |                                                                                     |
|    |                                                                                                              | Movement Disorders Journal                                                                   | Honorarium for serving as Associate Editor                                          |
|    |                                                                                                              | npjParkinson's Disease                                                                       | Honorarium for serving as Associate Editor                                          |
|    |                                                                                                              |                                                                                              |                                                                                     |
| 6  | Payment for expert testimony                                                                                 | <input checked="" type="checkbox"/> None                                                     |                                                                                     |
|    |                                                                                                              |                                                                                              |                                                                                     |
|    |                                                                                                              |                                                                                              |                                                                                     |
| 7  | Support for attending meetings and/or travel                                                                 | <input type="checkbox"/> None                                                                |                                                                                     |
|    |                                                                                                              | Chan Zuckerberg Initiative                                                                   | Sponsored travel to attend annual investigators meeting                             |
|    |                                                                                                              | Michael J Fox Foundation                                                                     | Sponsored travel to attend Parkinson's Progression Marker Initiative annual meeting |
|    |                                                                                                              | Weill Cornell                                                                                | Sponsored travel to give grand rounds                                               |
| 8  | Patents planned, issued or pending                                                                           | <input checked="" type="checkbox"/> None                                                     |                                                                                     |
|    |                                                                                                              |                                                                                              |                                                                                     |
|    |                                                                                                              |                                                                                              |                                                                                     |
| 9  | Participation on a Data Safety Monitoring Board or Advisory Board                                            | <input checked="" type="checkbox"/> None                                                     |                                                                                     |
|    |                                                                                                              |                                                                                              |                                                                                     |
|    |                                                                                                              |                                                                                              |                                                                                     |
| 10 | Leadership or fiduciary role in other board, society, committee or advocacy group, paid or unpaid            | <input checked="" type="checkbox"/> None                                                     |                                                                                     |
|    |                                                                                                              |                                                                                              |                                                                                     |
|    |                                                                                                              |                                                                                              |                                                                                     |

|           |                                                                                  | Name all entities with whom you have this relationship or indicate none (add rows as needed)                                                                                                                                                                                                                         | Specifications/Comments (e.g., if payments were made to you or to your institution) |  |  |  |  |  |  |
|-----------|----------------------------------------------------------------------------------|----------------------------------------------------------------------------------------------------------------------------------------------------------------------------------------------------------------------------------------------------------------------------------------------------------------------|-------------------------------------------------------------------------------------|--|--|--|--|--|--|
| <b>11</b> | Stock or stock options                                                           | <input checked="" type="checkbox"/> <b>None</b><br><table border="1" style="width: 100%; border-collapse: collapse;"> <tr><td style="width: 50%; height: 15px;"></td><td style="width: 50%;"></td></tr> <tr><td style="height: 15px;"></td><td></td></tr> <tr><td style="height: 15px;"></td><td></td></tr> </table> |                                                                                     |  |  |  |  |  |  |
|           |                                                                                  |                                                                                                                                                                                                                                                                                                                      |                                                                                     |  |  |  |  |  |  |
|           |                                                                                  |                                                                                                                                                                                                                                                                                                                      |                                                                                     |  |  |  |  |  |  |
|           |                                                                                  |                                                                                                                                                                                                                                                                                                                      |                                                                                     |  |  |  |  |  |  |
| <b>12</b> | Receipt of equipment, materials, drugs, medical writing, gifts or other services | <input checked="" type="checkbox"/> <b>None</b><br><table border="1" style="width: 100%; border-collapse: collapse;"> <tr><td style="width: 50%; height: 15px;"></td><td style="width: 50%;"></td></tr> <tr><td style="height: 15px;"></td><td></td></tr> <tr><td style="height: 15px;"></td><td></td></tr> </table> |                                                                                     |  |  |  |  |  |  |
|           |                                                                                  |                                                                                                                                                                                                                                                                                                                      |                                                                                     |  |  |  |  |  |  |
|           |                                                                                  |                                                                                                                                                                                                                                                                                                                      |                                                                                     |  |  |  |  |  |  |
|           |                                                                                  |                                                                                                                                                                                                                                                                                                                      |                                                                                     |  |  |  |  |  |  |
| <b>13</b> | Other financial or non-financial interests                                       | <input checked="" type="checkbox"/> <b>None</b><br><table border="1" style="width: 100%; border-collapse: collapse;"> <tr><td style="width: 50%; height: 15px;"></td><td style="width: 50%;"></td></tr> <tr><td style="height: 15px;"></td><td></td></tr> <tr><td style="height: 15px;"></td><td></td></tr> </table> |                                                                                     |  |  |  |  |  |  |
|           |                                                                                  |                                                                                                                                                                                                                                                                                                                      |                                                                                     |  |  |  |  |  |  |
|           |                                                                                  |                                                                                                                                                                                                                                                                                                                      |                                                                                     |  |  |  |  |  |  |
|           |                                                                                  |                                                                                                                                                                                                                                                                                                                      |                                                                                     |  |  |  |  |  |  |

**Please place an "X" next to the following statement to indicate your agreement:**

I certify that I have answered every question and have not altered the wording of any of the questions on this form.

## ICMJE DISCLOSURE FORM

Date: 12/14/2023

Your Name: Duygu Tosun

Manuscript Title: A Cross-sectional Study of  $\alpha$ -Synuclein Seed Amplification Assay in Alzheimer's Disease  
 Neuroimaging Initiative: Prevalence and Associations with Alzheimer's Disease Biomarkers and Cognitive Function

Manuscript number (if known): \_\_\_\_\_

In the interest of transparency, we ask you to disclose all relationships/activities/interests listed below that are related to the content of your manuscript. "Related" means any relation with for-profit or not-for-profit third parties whose interests may be affected by the content of the manuscript. Disclosure represents a commitment to transparency and does not necessarily indicate a bias. If you are in doubt about whether to list a relationship/activity/interest, it is preferable that you do so.

The following questions apply to the author's relationships/activities/interests as they relate to the **current manuscript only**.

The author's relationships/activities/interests should be **defined broadly**. For example, if your manuscript pertains to the epidemiology of hypertension, you should declare all relationships with manufacturers of antihypertensive medication, even if that medication is not mentioned in the manuscript.

In item #1 below, report all support for the work reported in this manuscript without time limit. For all other items, the time frame for disclosure is the past 36 months.

|                                                           |                                                                                                                                                                                | Name all entities with whom you have this relationship or indicate none (add rows as needed) | Specifications/Comments (e.g., if payments were made to you or to your institution) |
|-----------------------------------------------------------|--------------------------------------------------------------------------------------------------------------------------------------------------------------------------------|----------------------------------------------------------------------------------------------|-------------------------------------------------------------------------------------|
| <b>Time frame: Since the initial planning of the work</b> |                                                                                                                                                                                |                                                                                              |                                                                                     |
| 1                                                         | All support for the present manuscript (e.g., funding, provision of study materials, medical writing, article processing charges, etc.)<br><b>No time limit for this item.</b> | <u>  </u> None                                                                               |                                                                                     |
|                                                           |                                                                                                                                                                                | NIH/NIA                                                                                      |                                                                                     |
|                                                           |                                                                                                                                                                                |                                                                                              |                                                                                     |
|                                                           |                                                                                                                                                                                |                                                                                              |                                                                                     |
|                                                           |                                                                                                                                                                                |                                                                                              |                                                                                     |
| <b>Time frame: past 36 months</b>                         |                                                                                                                                                                                |                                                                                              |                                                                                     |
| 2                                                         | Grants or contracts from any entity (if not indicated in item #1 above).                                                                                                       | <u>  X  </u> None                                                                            |                                                                                     |
|                                                           |                                                                                                                                                                                |                                                                                              |                                                                                     |
| 3                                                         | Royalties or licenses                                                                                                                                                          | <u>  X  </u> None                                                                            |                                                                                     |
|                                                           |                                                                                                                                                                                |                                                                                              |                                                                                     |
| 4                                                         | Consulting fees                                                                                                                                                                | <u>  X  </u> None                                                                            |                                                                                     |

|    |                                                                                                              |                                          |  |
|----|--------------------------------------------------------------------------------------------------------------|------------------------------------------|--|
|    |                                                                                                              |                                          |  |
| 5  | Payment or honoraria for lectures, presentations, speakers bureaus, manuscript writing or educational events | <input checked="" type="checkbox"/> None |  |
| 6  | Payment for expert testimony                                                                                 | <input checked="" type="checkbox"/> None |  |
| 7  | Support for attending meetings and/or travel                                                                 | <input checked="" type="checkbox"/> None |  |
| 8  | Patents planned, issued or pending                                                                           | <input checked="" type="checkbox"/> None |  |
| 9  | Participation on a Data Safety Monitoring Board or Advisory Board                                            | <input checked="" type="checkbox"/> None |  |
| 10 | Leadership or fiduciary role in other board, society, committee or advocacy group, paid or unpaid            | <input checked="" type="checkbox"/> None |  |
| 11 | Stock or stock options                                                                                       | <input checked="" type="checkbox"/> None |  |
| 12 | Receipt of equipment, materials, drugs, medical writing, gifts or other services                             | <input checked="" type="checkbox"/> None |  |
| 13 | Other financial or non-financial interests                                                                   | <input checked="" type="checkbox"/> None |  |

Please place an "X" next to the following statement to indicate your agreement:

I certify that I have answered every question and have not altered the wording of any of the questions on this form.



## ICMJE DISCLOSURE FORM

Date: 15 Nov 2023

Name: Russell Lebovitz

Manuscript Title: A Cross-sectional Study of  $\alpha$ -Synuclein Seed Amplification Assay in Alzheimer's Disease Neuroimaging Initiative: Prevalence and Associations with Alzheimer's Disease Biomarkers and Cognitive Function

Manuscript number (if known): \_\_\_\_\_

In the interest of transparency, we ask you to disclose all relationships/activities/interests listed below that are related to the content of your manuscript. "Related" means any relation with for-profit or not-for-profit third parties whose interests may be affected by the content of the manuscript. Disclosure represents a commitment to transparency and does not necessarily indicate a bias. If you are in doubt about whether to list a relationship/activity/interest, it is preferable that you do so.

The following questions apply to the author's relationships/activities/interests as they relate to the current manuscript only.

The author's relationships/activities/interests should be defined broadly. For example, if your manuscript pertains to the epidemiology of hypertension, you should declare all relationships with manufacturers of antihypertensive medication, even if that medication is not mentioned in the manuscript.

|                                                           |                                                                                                                                                                                | Name all entities with whom you have this relationship or indicate none (add rows as needed) | Specifications/Comments (e.g., if payments were made to you or to your institution) |
|-----------------------------------------------------------|--------------------------------------------------------------------------------------------------------------------------------------------------------------------------------|----------------------------------------------------------------------------------------------|-------------------------------------------------------------------------------------|
| <b>Time frame: Since the initial planning of the work</b> |                                                                                                                                                                                |                                                                                              |                                                                                     |
| 1                                                         | All support for the present manuscript (e.g., funding, provision of study materials, medical writing, article processing charges, etc.)<br><b>No time limit for this item.</b> | Amprion Inc                                                                                  | RL is a full time employee of Amprion                                               |
|                                                           |                                                                                                                                                                                |                                                                                              |                                                                                     |
|                                                           |                                                                                                                                                                                |                                                                                              |                                                                                     |
|                                                           |                                                                                                                                                                                |                                                                                              |                                                                                     |
|                                                           |                                                                                                                                                                                |                                                                                              |                                                                                     |
|                                                           |                                                                                                                                                                                |                                                                                              |                                                                                     |
| <b>Time frame: past 36 months</b>                         |                                                                                                                                                                                |                                                                                              |                                                                                     |
| 2                                                         | Grants or contracts from any entity (if not indicated in item #1 above).                                                                                                       | <input checked="" type="checkbox"/> None                                                     |                                                                                     |
| 3                                                         | Royalties or licenses                                                                                                                                                          | <input checked="" type="checkbox"/> None                                                     |                                                                                     |
| 4                                                         | Consulting fees                                                                                                                                                                | <input checked="" type="checkbox"/> None                                                     |                                                                                     |

|    |                                                                                                              |                                          |                          |
|----|--------------------------------------------------------------------------------------------------------------|------------------------------------------|--------------------------|
| 5  | Payment or honoraria for lectures, presentations, speakers bureaus, manuscript writing or educational events | <input checked="" type="checkbox"/> None |                          |
| 6  | Payment for expert testimony                                                                                 | <input checked="" type="checkbox"/> None |                          |
| 7  | Support for attending meetings and/or travel                                                                 | Alzheimer's Drug Discovery Foundation    | Payments made to Amprion |
| 8  | Patents planned, issued or pending                                                                           | <input checked="" type="checkbox"/> None |                          |
| 9  | Participation on a Data Safety Monitoring Board or Advisory Board                                            | <input checked="" type="checkbox"/> None |                          |
| 10 | Leadership or fiduciary role in other board, society, committee or advocacy group, paid or unpaid            | <input checked="" type="checkbox"/> None |                          |
| 11 | Stock or stock options                                                                                       | Amprion Inc                              |                          |
| 12 | Receipt of equipment, materials, drugs, medical writing, gifts or other services                             | <input checked="" type="checkbox"/> None |                          |
| 13 | Other financial or non-financial interests                                                                   | <input checked="" type="checkbox"/> None |                          |

Please place an "X" next to the following statement to indicate your agreement:

I certify that I have answered every question and have not altered the wording of any of the questions on this form.

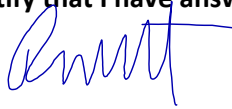

## ICMJE DISCLOSURE FORM

Date: December 13 2023

Your Name: Mike A. Nalls

Manuscript Title: A Cross-sectional Study of  $\alpha$ -Synuclein Seed Amplification Assay in Alzheimer's Disease Neuroimaging Initiative: Prevalence and Associations with Alzheimer's Disease Biomarkers and Cognitive Function

Manuscript number (if known): \_\_\_\_\_

In the interest of transparency, we ask you to disclose all relationships/activities/interests listed below that are related to the content of your manuscript. "Related" means any relation with for-profit or not-for-profit third parties whose interests may be affected by the content of the manuscript. Disclosure represents a commitment to transparency and does not necessarily indicate a bias. If you are in doubt about whether to list a relationship/activity/interest, it is preferable that you do so.

The following questions apply to the author's relationships/activities/interests as they relate to the current manuscript only.

The author's relationships/activities/interests should be defined broadly. For example, if your manuscript pertains to the epidemiology of hypertension, you should declare all relationships with manufacturers of antihypertensive medication, even if that medication is not mentioned in the manuscript.

In item #1 below, report all support for the work reported in this manuscript without time limit. For all other items, the time frame for disclosure is the past 36 months.

|                                                           |                                                                                                                                                                                | Name all entities with whom you have this relationship or indicate none (add rows as needed) | Specifications/Comments (e.g., if payments were made to you or to your institution) |
|-----------------------------------------------------------|--------------------------------------------------------------------------------------------------------------------------------------------------------------------------------|----------------------------------------------------------------------------------------------|-------------------------------------------------------------------------------------|
| <b>Time frame: Since the initial planning of the work</b> |                                                                                                                                                                                |                                                                                              |                                                                                     |
| 1                                                         | All support for the present manuscript (e.g., funding, provision of study materials, medical writing, article processing charges, etc.)<br><b>No time limit for this item.</b> | Carried out as part of contract work for NIH consultancy.                                    |                                                                                     |
|                                                           |                                                                                                                                                                                |                                                                                              |                                                                                     |
|                                                           |                                                                                                                                                                                |                                                                                              |                                                                                     |
|                                                           |                                                                                                                                                                                |                                                                                              |                                                                                     |
|                                                           |                                                                                                                                                                                |                                                                                              |                                                                                     |
|                                                           |                                                                                                                                                                                |                                                                                              |                                                                                     |
| <b>Time frame: past 36 months</b>                         |                                                                                                                                                                                |                                                                                              |                                                                                     |
| 2                                                         | Grants or contracts from any entity (if not indicated in item #1 above).                                                                                                       | <u>  </u> X <u>  </u> None                                                                   |                                                                                     |
|                                                           |                                                                                                                                                                                |                                                                                              |                                                                                     |
| 3                                                         | Royalties or licenses                                                                                                                                                          | <u>  </u> X <u>  </u> None                                                                   |                                                                                     |
|                                                           |                                                                                                                                                                                |                                                                                              |                                                                                     |
|                                                           |                                                                                                                                                                                |                                                                                              |                                                                                     |

|    |                                                                                                              |                                          |  |
|----|--------------------------------------------------------------------------------------------------------------|------------------------------------------|--|
| 4  | Consulting fees                                                                                              | Yes, please see above.                   |  |
| 5  | Payment or honoraria for lectures, presentations, speakers bureaus, manuscript writing or educational events | <input checked="" type="checkbox"/> None |  |
| 6  | Payment for expert testimony                                                                                 | <input checked="" type="checkbox"/> None |  |
| 7  | Support for attending meetings and/or travel                                                                 | <input checked="" type="checkbox"/> None |  |
| 8  | Patents planned, issued or pending                                                                           | <input checked="" type="checkbox"/> None |  |
| 9  | Participation on a Data Safety Monitoring Board or Advisory Board                                            | <input checked="" type="checkbox"/> None |  |
| 10 | Leadership or fiduciary role in other board, society, committee or advocacy group, paid or unpaid            | <input checked="" type="checkbox"/> None |  |
| 11 | Stock or stock options                                                                                       | <input checked="" type="checkbox"/> None |  |
| 12 | Receipt of equipment, materials, drugs, medical writing, gifts or other services                             | <input checked="" type="checkbox"/> None |  |
| 13 | Other financial or non-financial interests                                                                   | <input checked="" type="checkbox"/> None |  |

Please place an "X" next to the following statement to indicate your agreement:

I certify that I have answered every question and have not altered the wording of any of the questions on this form.

## ICMJE DISCLOSURE FORM

Date: Nov 16, 2023

Your Name: Jennifer Lamoureux

Manuscript Title: A Cross-sectional Study of  $\alpha$ -Synuclein Seed Amplification Assay in Alzheimer's Disease Neuroimaging Initiative: Prevalence and Associations with Alzheimer's Disease Biomarkers and Cognitive Function

Manuscript number (if known): \_\_\_\_\_

In the interest of transparency, we ask you to disclose all relationships/activities/interests listed below that are related to the content of your manuscript. "Related" means any relation with for-profit or not-for-profit third parties whose interests may be affected by the content of the manuscript. Disclosure represents a commitment to transparency and does not necessarily indicate a bias. If you are in doubt about whether to list a relationship/activity/interest, it is preferable that you do so.

The following questions apply to the author's relationships/activities/interests as they relate to the **current manuscript only**.

The author's relationships/activities/interests should be **defined broadly**. For example, if your manuscript pertains to the epidemiology of hypertension, you should declare all relationships with manufacturers of antihypertensive medication, even if that medication is not mentioned in the manuscript.

In item #1 below, report all support for the work reported in this manuscript without time limit. For all other items, the time frame for disclosure is the past 36 months.

|                                                           |                                                                                                                                                                                | Name all entities with whom you have this relationship or indicate none (add rows as needed) | Specifications/Comments (e.g., if payments were made to you or to your institution)                                                                                                                          |
|-----------------------------------------------------------|--------------------------------------------------------------------------------------------------------------------------------------------------------------------------------|----------------------------------------------------------------------------------------------|--------------------------------------------------------------------------------------------------------------------------------------------------------------------------------------------------------------|
| <b>Time frame: Since the initial planning of the work</b> |                                                                                                                                                                                |                                                                                              |                                                                                                                                                                                                              |
| 1                                                         | All support for the present manuscript (e.g., funding, provision of study materials, medical writing, article processing charges, etc.)<br><b>No time limit for this item.</b> | <u>    </u> None                                                                             |                                                                                                                                                                                                              |
|                                                           |                                                                                                                                                                                | Employee of Amprion                                                                          | JL is an employee of Amprion. Amprion supported SAA analysis of CSF from all autopsy specimens for this study. The samples were blinded and coded by ADNI before being sent to Amprion.                      |
|                                                           |                                                                                                                                                                                | NIH/CARD                                                                                     | SAA analysis of CSF from non-autopsy ADNI samples was generously supported by NIH- Center for Alzheimer's and Related Dementias (CARD). Samples were blinded and coded by ADNI before being sent to Amprion. |
|                                                           |                                                                                                                                                                                |                                                                                              |                                                                                                                                                                                                              |
|                                                           |                                                                                                                                                                                |                                                                                              |                                                                                                                                                                                                              |
| <b>Time frame: past 36 months</b>                         |                                                                                                                                                                                |                                                                                              |                                                                                                                                                                                                              |
| 2                                                         |                                                                                                                                                                                | <u>  X  </u> None                                                                            |                                                                                                                                                                                                              |

|    |                                                                                                              |                                               |                                                                                                                    |
|----|--------------------------------------------------------------------------------------------------------------|-----------------------------------------------|--------------------------------------------------------------------------------------------------------------------|
|    | Grants or contracts from any entity (if not indicated in item #1 above).                                     |                                               |                                                                                                                    |
| 3  | Royalties or licenses                                                                                        | <input checked="" type="checkbox"/> None      |                                                                                                                    |
| 4  | Consulting fees                                                                                              | <input checked="" type="checkbox"/> None      |                                                                                                                    |
| 5  | Payment or honoraria for lectures, presentations, speakers bureaus, manuscript writing or educational events | <input checked="" type="checkbox"/> None      |                                                                                                                    |
| 6  | Payment for expert testimony                                                                                 | <input checked="" type="checkbox"/> None      |                                                                                                                    |
| 7  | Support for attending meetings and/or travel                                                                 | <input checked="" type="checkbox"/> None      |                                                                                                                    |
| 8  | Patents planned, issued or pending                                                                           | <input checked="" type="checkbox"/> None      |                                                                                                                    |
| 9  | Participation on a Data Safety Monitoring Board or Advisory Board                                            | <input checked="" type="checkbox"/> None      |                                                                                                                    |
| 10 | Leadership or fiduciary role in other board, society, committee or advocacy group, paid or unpaid            | <input checked="" type="checkbox"/> None      |                                                                                                                    |
| 11 | Stock or stock options                                                                                       | <input type="checkbox"/> None                 | JL is an employee of Amprion and is therefore eligible for employee stock options associated with this employment. |
| 12 | Receipt of equipment, materials, drugs, medical writing, gifts or other services                             | <input checked="" type="checkbox"/> None      |                                                                                                                    |
| 13 | Other financial or non-financial interests                                                                   | <input type="checkbox"/> None<br>Amprion, Inc | JL is an employee of Amprion                                                                                       |

Please place an "X" next to the following statement to indicate your agreement:

I certify that I have answered every question and have not altered the wording of any of the questions on this form.

## ICMJE DISCLOSURE FORM

Date: December 13 2023

Your Name: Cornelis Blauwendraat

Manuscript Title: A Cross-sectional Study of  $\alpha$ -Synuclein Seed Amplification Assay in Alzheimer's Disease Neuroimaging Initiative: Prevalence and Associations with Alzheimer's Disease Biomarkers and Cognitive Function

Manuscript number (if known): \_\_\_\_\_

In the interest of transparency, we ask you to disclose all relationships/activities/interests listed below that are related to the content of your manuscript. "Related" means any relation with for-profit or not-for-profit third parties whose interests may be affected by the content of the manuscript. Disclosure represents a commitment to transparency and does not necessarily indicate a bias. If you are in doubt about whether to list a relationship/activity/interest, it is preferable that you do so.

The following questions apply to the author's relationships/activities/interests as they relate to the current manuscript only.

The author's relationships/activities/interests should be defined broadly. For example, if your manuscript pertains to the epidemiology of hypertension, you should declare all relationships with manufacturers of antihypertensive medication, even if that medication is not mentioned in the manuscript.

In item #1 below, report all support for the work reported in this manuscript without time limit. For all other items, the time frame for disclosure is the past 36 months.

|                                                           |                                                                                                                                                                                | Name all entities with whom you have this relationship or indicate none (add rows as needed) | Specifications/Comments (e.g., if payments were made to you or to your institution) |
|-----------------------------------------------------------|--------------------------------------------------------------------------------------------------------------------------------------------------------------------------------|----------------------------------------------------------------------------------------------|-------------------------------------------------------------------------------------|
| <b>Time frame: Since the initial planning of the work</b> |                                                                                                                                                                                |                                                                                              |                                                                                     |
| 1                                                         | All support for the present manuscript (e.g., funding, provision of study materials, medical writing, article processing charges, etc.)<br><b>No time limit for this item.</b> | <u>  </u> <input checked="" type="checkbox"/> <u>  </u> None                                 |                                                                                     |
|                                                           |                                                                                                                                                                                |                                                                                              |                                                                                     |
|                                                           |                                                                                                                                                                                |                                                                                              |                                                                                     |
|                                                           |                                                                                                                                                                                |                                                                                              |                                                                                     |
|                                                           |                                                                                                                                                                                |                                                                                              |                                                                                     |
| <b>Time frame: past 36 months</b>                         |                                                                                                                                                                                |                                                                                              |                                                                                     |
| 2                                                         | Grants or contracts from any entity (if not indicated in item #1 above).                                                                                                       | <u>  </u> <input checked="" type="checkbox"/> <u>  </u> None                                 |                                                                                     |
|                                                           |                                                                                                                                                                                |                                                                                              |                                                                                     |
| 3                                                         | Royalties or licenses                                                                                                                                                          | <u>  </u> <input checked="" type="checkbox"/> <u>  </u> None                                 |                                                                                     |
|                                                           |                                                                                                                                                                                |                                                                                              |                                                                                     |
| 4                                                         | Consulting fees                                                                                                                                                                | <u>  </u> <input checked="" type="checkbox"/> <u>  </u> None                                 |                                                                                     |
|                                                           |                                                                                                                                                                                |                                                                                              |                                                                                     |

|    |                                                                                                              |                                          |  |
|----|--------------------------------------------------------------------------------------------------------------|------------------------------------------|--|
|    |                                                                                                              |                                          |  |
| 5  | Payment or honoraria for lectures, presentations, speakers bureaus, manuscript writing or educational events | <input checked="" type="checkbox"/> None |  |
| 6  | Payment for expert testimony                                                                                 | <input checked="" type="checkbox"/> None |  |
| 7  | Support for attending meetings and/or travel                                                                 | <input checked="" type="checkbox"/> None |  |
| 8  | Patents planned, issued or pending                                                                           | <input checked="" type="checkbox"/> None |  |
| 9  | Participation on a Data Safety Monitoring Board or Advisory Board                                            | <input checked="" type="checkbox"/> None |  |
| 10 | Leadership or fiduciary role in other board, society, committee or advocacy group, paid or unpaid            | <input checked="" type="checkbox"/> None |  |
| 11 | Stock or stock options                                                                                       | <input checked="" type="checkbox"/> None |  |
| 12 | Receipt of equipment, materials, drugs, medical writing, gifts or other services                             | <input checked="" type="checkbox"/> None |  |
| 13 | Other financial or non-financial interests                                                                   | <input checked="" type="checkbox"/> None |  |

Please place an "X" next to the following statement to indicate your agreement:

I certify that I have answered every question and have not altered the wording of any of the questions on this form.



## ICMJE DISCLOSURE FORM

Date: 12/13/2023

Your Name: Edward B. Lee

Manuscript Title: A Cross-sectional Study of  $\alpha$ -Synuclein Seed Amplification Assay in Alzheimer's Disease Neuroimaging Initiative: Prevalence and Associations with Alzheimer's Disease Biomarkers and Cognitive Function

Manuscript number (if known): \_\_\_\_\_

In the interest of transparency, we ask you to disclose all relationships/activities/interests listed below that are related to the content of your manuscript. "Related" means any relation with for-profit or not-for-profit third parties whose interests may be affected by the content of the manuscript. Disclosure represents a commitment to transparency and does not necessarily indicate a bias. If you are in doubt about whether to list a relationship/activity/interest, it is preferable that you do so.

The following questions apply to the author's relationships/activities/interests as they relate to the current manuscript only.

The author's relationships/activities/interests should be defined broadly. For example, if your manuscript pertains to the epidemiology of hypertension, you should declare all relationships with manufacturers of antihypertensive medication, even if that medication is not mentioned in the manuscript.

In item #1 below, report all support for the work reported in this manuscript without time limit. For all other items, the time frame for disclosure is the past 36 months.

|                                                           |                                                                                                                                                                                | Name all entities with whom you have this relationship or indicate none (add rows as needed) | Specifications/Comments (e.g., if payments were made to you or to your institution) |
|-----------------------------------------------------------|--------------------------------------------------------------------------------------------------------------------------------------------------------------------------------|----------------------------------------------------------------------------------------------|-------------------------------------------------------------------------------------|
| <b>Time frame: Since the initial planning of the work</b> |                                                                                                                                                                                |                                                                                              |                                                                                     |
| 1                                                         | All support for the present manuscript (e.g., funding, provision of study materials, medical writing, article processing charges, etc.)<br><b>No time limit for this item.</b> | NIA/NIH (U19 ADNI grant)                                                                     |                                                                                     |
|                                                           |                                                                                                                                                                                |                                                                                              |                                                                                     |
|                                                           |                                                                                                                                                                                |                                                                                              |                                                                                     |
|                                                           |                                                                                                                                                                                |                                                                                              |                                                                                     |
|                                                           |                                                                                                                                                                                |                                                                                              |                                                                                     |
| <b>Time frame: past 36 months</b>                         |                                                                                                                                                                                |                                                                                              |                                                                                     |
| 2                                                         | Grants or contracts from any entity (if not indicated in item #1 above).                                                                                                       | <input checked="" type="checkbox"/> None                                                     |                                                                                     |
|                                                           |                                                                                                                                                                                |                                                                                              |                                                                                     |
| 3                                                         | Royalties or licenses                                                                                                                                                          | <input checked="" type="checkbox"/> None                                                     |                                                                                     |
|                                                           |                                                                                                                                                                                |                                                                                              |                                                                                     |
| 4                                                         | Consulting fees                                                                                                                                                                | <input checked="" type="checkbox"/> None                                                     |                                                                                     |
|                                                           |                                                                                                                                                                                |                                                                                              |                                                                                     |

|    |                                                                                                              |                                          |  |
|----|--------------------------------------------------------------------------------------------------------------|------------------------------------------|--|
|    |                                                                                                              |                                          |  |
| 5  | Payment or honoraria for lectures, presentations, speakers bureaus, manuscript writing or educational events | <input checked="" type="checkbox"/> None |  |
| 6  | Payment for expert testimony                                                                                 | <input checked="" type="checkbox"/> None |  |
| 7  | Support for attending meetings and/or travel                                                                 | <input checked="" type="checkbox"/> None |  |
| 8  | Patents planned, issued or pending                                                                           | <input checked="" type="checkbox"/> None |  |
| 9  | Participation on a Data Safety Monitoring Board or Advisory Board                                            | <input checked="" type="checkbox"/> None |  |
| 10 | Leadership or fiduciary role in other board, society, committee or advocacy group, paid or unpaid            | <input checked="" type="checkbox"/> None |  |
| 11 | Stock or stock options                                                                                       | <input checked="" type="checkbox"/> None |  |
| 12 | Receipt of equipment, materials, drugs, medical writing, gifts or other services                             | <input checked="" type="checkbox"/> None |  |
| 13 | Other financial or non-financial interests                                                                   | <input checked="" type="checkbox"/> None |  |

Please place an "X" next to the following statement to indicate your agreement:

I certify that I have answered every question and have not altered the wording of any of the questions on this form.

## ICMJE DISCLOSURE FORM

Date: November 17 2023

Your Name: Hiroataka Iwaki

Manuscript Title: A Cross-sectional Study of  $\alpha$ -Synuclein Seed Amplification Assay in Alzheimer's Disease Neuroimaging Initiative: Prevalence and Associations with Alzheimer's Disease Biomarkers and Cognitive Function

Manuscript number (if known): \_\_\_\_\_

In the interest of transparency, we ask you to disclose all relationships/activities/interests listed below that are related to the content of your manuscript. "Related" means any relation with for-profit or not-for-profit third parties whose interests may be affected by the content of the manuscript. Disclosure represents a commitment to transparency and does not necessarily indicate a bias. If you are in doubt about whether to list a relationship/activity/interest, it is preferable that you do so.

The following questions apply to the author's relationships/activities/interests as they relate to the current manuscript only.

The author's relationships/activities/interests should be defined broadly. For example, if your manuscript pertains to the epidemiology of hypertension, you should declare all relationships with manufacturers of antihypertensive medication, even if that medication is not mentioned in the manuscript.

In item #1 below, report all support for the work reported in this manuscript without time limit. For all other items, the time frame for disclosure is the past 36 months.

|                                                           |                                                                                                                                                                                | Name all entities with whom you have this relationship or indicate none (add rows as needed) | Specifications/Comments (e.g., if payments were made to you or to your institution)                                       |
|-----------------------------------------------------------|--------------------------------------------------------------------------------------------------------------------------------------------------------------------------------|----------------------------------------------------------------------------------------------|---------------------------------------------------------------------------------------------------------------------------|
| <b>Time frame: Since the initial planning of the work</b> |                                                                                                                                                                                |                                                                                              |                                                                                                                           |
| 1                                                         | All support for the present manuscript (e.g., funding, provision of study materials, medical writing, article processing charges, etc.)<br><b>No time limit for this item.</b> | Data Tecnica International                                                                   | Employment                                                                                                                |
|                                                           |                                                                                                                                                                                | National Institutes of Health to support open science research.                              | A competitive contract awarded to Data Tecnica LLC by the National Institutes of Health to support open science research. |
|                                                           |                                                                                                                                                                                |                                                                                              |                                                                                                                           |
|                                                           |                                                                                                                                                                                |                                                                                              |                                                                                                                           |
|                                                           |                                                                                                                                                                                |                                                                                              |                                                                                                                           |
|                                                           |                                                                                                                                                                                |                                                                                              |                                                                                                                           |
| <b>Time frame: past 36 months</b>                         |                                                                                                                                                                                |                                                                                              |                                                                                                                           |
| 2                                                         | Grants or contracts from any entity (if not indicated in item #1 above).                                                                                                       | <input checked="" type="checkbox"/> None                                                     |                                                                                                                           |
|                                                           |                                                                                                                                                                                |                                                                                              |                                                                                                                           |
| 3                                                         | Royalties or licenses                                                                                                                                                          | <input checked="" type="checkbox"/> None                                                     |                                                                                                                           |
|                                                           |                                                                                                                                                                                |                                                                                              |                                                                                                                           |
|                                                           |                                                                                                                                                                                |                                                                                              |                                                                                                                           |

|    |                                                                                                              |                                          |                                                    |
|----|--------------------------------------------------------------------------------------------------------------|------------------------------------------|----------------------------------------------------|
| 4  | Consulting fees                                                                                              | <input checked="" type="checkbox"/> None |                                                    |
| 5  | Payment or honoraria for lectures, presentations, speakers bureaus, manuscript writing or educational events | <input type="checkbox"/> None            | Michael J. Fox Foundation for Parkinson's Research |
| 6  | Payment for expert testimony                                                                                 | <input checked="" type="checkbox"/> None |                                                    |
| 7  | Support for attending meetings and/or travel                                                                 | <input checked="" type="checkbox"/> None |                                                    |
| 8  | Patents planned, issued or pending                                                                           | <input checked="" type="checkbox"/> None |                                                    |
| 9  | Participation on a Data Safety Monitoring Board or Advisory Board                                            | <input checked="" type="checkbox"/> None |                                                    |
| 10 | Leadership or fiduciary role in other board, society, committee or advocacy group, paid or unpaid            | <input checked="" type="checkbox"/> None |                                                    |
| 11 | Stock or stock options                                                                                       | <input checked="" type="checkbox"/> None |                                                    |
| 12 | Receipt of equipment, materials, drugs, medical writing, gifts or other services                             | <input checked="" type="checkbox"/> None |                                                    |
| 13 | Other financial or non-financial interests                                                                   | <input checked="" type="checkbox"/> None |                                                    |

Please place an "X" next to the following statement to indicate your agreement:

I certify that I have answered every question and have not altered the wording of any of the questions on this form.

## ICMJE DISCLOSURE FORM

Date: Nov 16, 2023

Your Name: Karen MacLeod

Manuscript Title: **A Cross-sectional Study of  $\alpha$ -Synuclein Seed Amplification Assay in Alzheimer's Disease Neuroimaging Initiative: Prevalence and Associations with Alzheimer's Disease Biomarkers and Cognitive Function**

Manuscript number (if known): \_\_\_\_\_

In the interest of transparency, we ask you to disclose all relationships/activities/interests listed below that are related to the content of your manuscript. "Related" means any relation with for-profit or not-for-profit third parties whose interests may be affected by the content of the manuscript. Disclosure represents a commitment to transparency and does not necessarily indicate a bias. If you are in doubt about whether to list a relationship/activity/interest, it is preferable that you do so.

The following questions apply to the author's relationships/activities/interests as they relate to the **current manuscript only**.

The author's relationships/activities/interests should be **defined broadly**. For example, if your manuscript pertains to the epidemiology of hypertension, you should declare all relationships with manufacturers of antihypertensive medication, even if that medication is not mentioned in the manuscript.

In item #1 below, report all support for the work reported in this manuscript without time limit. For all other items, the time frame for disclosure is the past 36 months.

|                                                           |                                                                                                                                                                                | Name all entities with whom you have this relationship or indicate none (add rows as needed) | Specifications/Comments (e.g., if payments were made to you or to your institution)                                                                                                                          |
|-----------------------------------------------------------|--------------------------------------------------------------------------------------------------------------------------------------------------------------------------------|----------------------------------------------------------------------------------------------|--------------------------------------------------------------------------------------------------------------------------------------------------------------------------------------------------------------|
| <b>Time frame: Since the initial planning of the work</b> |                                                                                                                                                                                |                                                                                              |                                                                                                                                                                                                              |
| 1                                                         | All support for the present manuscript (e.g., funding, provision of study materials, medical writing, article processing charges, etc.)<br><b>No time limit for this item.</b> | None                                                                                         |                                                                                                                                                                                                              |
|                                                           |                                                                                                                                                                                | Amprion Inc.                                                                                 | KM is an employee of Amprion. Amprion supported SAA analysis of CSF from all autopsy specimens for this study. The samples were blinded and coded by ADNI before being sent to Amprion.                      |
|                                                           |                                                                                                                                                                                | NIH, CARD                                                                                    | SAA analysis of CSF from non-autopsy ADNI samples was generously supported by NIH- Center for Alzheimer's and Related Dementias (CARD). Samples were blinded and coded by ADNI before being sent to Amprion. |
|                                                           |                                                                                                                                                                                |                                                                                              |                                                                                                                                                                                                              |
|                                                           |                                                                                                                                                                                |                                                                                              |                                                                                                                                                                                                              |
| <b>Time frame: past 36 months</b>                         |                                                                                                                                                                                |                                                                                              |                                                                                                                                                                                                              |
| 2                                                         |                                                                                                                                                                                | None                                                                                         | See above                                                                                                                                                                                                    |

|    |                                                                                                              |                                               |                                                                                                                    |
|----|--------------------------------------------------------------------------------------------------------------|-----------------------------------------------|--------------------------------------------------------------------------------------------------------------------|
|    | Grants or contracts from any entity (if not indicated in item #1 above).                                     |                                               |                                                                                                                    |
| 3  | Royalties or licenses                                                                                        | <input checked="" type="checkbox"/> None      |                                                                                                                    |
| 4  | Consulting fees                                                                                              | <input checked="" type="checkbox"/> None      |                                                                                                                    |
| 5  | Payment or honoraria for lectures, presentations, speakers bureaus, manuscript writing or educational events | <input checked="" type="checkbox"/> None      |                                                                                                                    |
| 6  | Payment for expert testimony                                                                                 | <input checked="" type="checkbox"/> None      |                                                                                                                    |
| 7  | Support for attending meetings and/or travel                                                                 | <input checked="" type="checkbox"/> None      |                                                                                                                    |
| 8  | Patents planned, issued or pending                                                                           | <input checked="" type="checkbox"/> None      |                                                                                                                    |
| 9  | Participation on a Data Safety Monitoring Board or Advisory Board                                            | <input checked="" type="checkbox"/> None      |                                                                                                                    |
| 10 | Leadership or fiduciary role in other board, society, committee or advocacy group, paid or unpaid            | <input checked="" type="checkbox"/> None      |                                                                                                                    |
| 11 | Stock or stock options                                                                                       | <input type="checkbox"/> None<br>Amprion Inc. | KM is an employee of Amprion and is therefore eligible for employee stock options associated with this employment. |
| 12 | Receipt of equipment, materials, drugs, medical writing, gifts or other services                             | <input checked="" type="checkbox"/> None      |                                                                                                                    |
| 13 | Other financial or non-financial interests                                                                   | <input type="checkbox"/> None<br>Amprion Inc. | KM is an employee of Amprion                                                                                       |

Please place an "X" next to the following statement to indicate your agreement:

I certify that I have answered every question and have not altered the wording of any of the questions on this form.

## ICMJE DISCLOSURE FORM

Date: 12/13/2023

Your Name: Pamela Thropp

Manuscript Title: *A Cross-sectional Study of  $\alpha$ -Synuclein Seed Amplification Assay in Alzheimer's Disease Neuroimaging Initiative: Prevalence and Relationship with Alzheimer's Disease Biomarkers and Cognitive Measures*

Manuscript number (if known): \_\_\_\_\_

In the interest of transparency, we ask you to disclose all relationships/activities/interests listed below that are related to the content of your manuscript. "Related" means any relation with for-profit or not-for-profit third parties whose interests may be affected by the content of the manuscript. Disclosure represents a commitment to transparency and does not necessarily indicate a bias. If you are in doubt about whether to list a relationship/activity/interest, it is preferable that you do so.

The following questions apply to the author's relationships/activities/interests as they relate to the **current manuscript only**.

The author's relationships/activities/interests should be **defined broadly**. For example, if your manuscript pertains to the epidemiology of hypertension, you should declare all relationships with manufacturers of antihypertensive medication, even if that medication is not mentioned in the manuscript.

In item #1 below, report all support for the work reported in this manuscript without time limit. For all other items, the time frame for disclosure is the past 36 months.

|                                                           |                                                                                                                                                                                | Name all entities with whom you have this relationship or indicate none (add rows as needed) | Specifications/Comments (e.g., if payments were made to you or to your institution) |
|-----------------------------------------------------------|--------------------------------------------------------------------------------------------------------------------------------------------------------------------------------|----------------------------------------------------------------------------------------------|-------------------------------------------------------------------------------------|
| <b>Time frame: Since the initial planning of the work</b> |                                                                                                                                                                                |                                                                                              |                                                                                     |
| 1                                                         | All support for the present manuscript (e.g., funding, provision of study materials, medical writing, article processing charges, etc.)<br><b>No time limit for this item.</b> | NIH/NIA                                                                                      |                                                                                     |
|                                                           |                                                                                                                                                                                |                                                                                              |                                                                                     |
|                                                           |                                                                                                                                                                                |                                                                                              |                                                                                     |
|                                                           |                                                                                                                                                                                |                                                                                              |                                                                                     |
|                                                           |                                                                                                                                                                                |                                                                                              |                                                                                     |
|                                                           |                                                                                                                                                                                |                                                                                              |                                                                                     |
| <b>Time frame: past 36 months</b>                         |                                                                                                                                                                                |                                                                                              |                                                                                     |
| 2                                                         | Grants or contracts from any entity (if not indicated in item #1 above).                                                                                                       | <input checked="" type="checkbox"/> None                                                     |                                                                                     |
|                                                           |                                                                                                                                                                                |                                                                                              |                                                                                     |
| 3                                                         | Royalties or licenses                                                                                                                                                          | <input checked="" type="checkbox"/> None                                                     |                                                                                     |
|                                                           |                                                                                                                                                                                |                                                                                              |                                                                                     |
| 4                                                         | Consulting fees                                                                                                                                                                | <input checked="" type="checkbox"/> None                                                     |                                                                                     |
|                                                           |                                                                                                                                                                                |                                                                                              |                                                                                     |

|    |                                                                                                              |                                          |  |
|----|--------------------------------------------------------------------------------------------------------------|------------------------------------------|--|
|    |                                                                                                              |                                          |  |
| 5  | Payment or honoraria for lectures, presentations, speakers bureaus, manuscript writing or educational events | <input checked="" type="checkbox"/> None |  |
| 6  | Payment for expert testimony                                                                                 | <input checked="" type="checkbox"/> None |  |
| 7  | Support for attending meetings and/or travel                                                                 | <input checked="" type="checkbox"/> None |  |
| 8  | Patents planned, issued or pending                                                                           | <input checked="" type="checkbox"/> None |  |
| 9  | Participation on a Data Safety Monitoring Board or Advisory Board                                            | <input checked="" type="checkbox"/> None |  |
| 10 | Leadership or fiduciary role in other board, society, committee or advocacy group, paid or unpaid            | <input checked="" type="checkbox"/> None |  |
| 11 | Stock or stock options                                                                                       | <input checked="" type="checkbox"/> None |  |
| 12 | Receipt of equipment, materials, drugs, medical writing, gifts or other services                             | <input checked="" type="checkbox"/> None |  |
| 13 | Other financial or non-financial interests                                                                   | <input checked="" type="checkbox"/> None |  |

Please place an "X" next to the following statement to indicate your agreement:

I certify that I have answered every question and have not altered the wording of any of the questions on this form.



## ICMJJE DISCLOSURE FORM

Date: \_\_\_\_\_ 12/13/2023 \_\_\_\_\_

Your Name: \_\_\_\_\_ Zachary Hausle  
 Hausle \_\_\_\_\_

**Manuscript Title:** *A Cross-sectional Study of  $\alpha$ -Synuclein Seed Amplification Assay in Alzheimer's Disease Neuroimaging Initiative: Prevalence and Relationship with Alzheimer's Disease Biomarkers and Cognitive Measures*

**Manuscript number (if known):** \_\_\_\_\_

In the interest of transparency, we ask you to disclose all relationships/activities/interests listed below that are related to the content of your manuscript. "Related" means any relation with for-profit or not-for-profit third parties whose interests may be affected by the content of the manuscript. Disclosure represents a commitment to transparency and does not necessarily indicate a bias. If you are in doubt about whether to list a relationship/activity/interest, it is preferable that you do so.

The following questions apply to the author's relationships/activities/interests as they relate to the current manuscript only.

The author's relationships/activities/interests should be defined broadly. For example, if your manuscript pertains to the epidemiology of hypertension, you should declare all relationships with manufacturers of antihypertensive medication, even if that medication is not mentioned in the manuscript.

In item #1 below, report all support for the work reported in this manuscript without time limit. For all other items, the time frame for disclosure is the past 36 months.

|                                                           |                                                                                                                                         | Name all entities with whom you have this relationship or indicate none (add | Specifications/Comments (e.g., if payments were made to you or to your institution) |
|-----------------------------------------------------------|-----------------------------------------------------------------------------------------------------------------------------------------|------------------------------------------------------------------------------|-------------------------------------------------------------------------------------|
| <b>Time frame: Since the initial planning of the work</b> |                                                                                                                                         |                                                                              |                                                                                     |
| 1                                                         | All support for the present manuscript (e.g., funding, provision of study materials, medical writing, article processing charges, etc.) | NIH/NIA                                                                      |                                                                                     |
|                                                           |                                                                                                                                         |                                                                              |                                                                                     |
|                                                           |                                                                                                                                         |                                                                              |                                                                                     |
|                                                           |                                                                                                                                         |                                                                              |                                                                                     |

|                                   |                                                                                                       |                                          |  |
|-----------------------------------|-------------------------------------------------------------------------------------------------------|------------------------------------------|--|
|                                   | <b>No time limit for this item.</b>                                                                   |                                          |  |
| <b>Time frame: past 36 months</b> |                                                                                                       |                                          |  |
| 2                                 | Grants or contracts from any entity (if not indicated in item #1 above).                              | <input checked="" type="checkbox"/> None |  |
| 3                                 | Royalties or licenses                                                                                 | <input checked="" type="checkbox"/> None |  |
| 4                                 | Consulting fees                                                                                       | <input type="checkbox"/> None            |  |
| 5                                 | Payment or honoraria for lectures, presentations, speakers bureaus, manuscript writing or educational | <input checked="" type="checkbox"/> None |  |
| 6                                 | Payment for expert testimony                                                                          | <input checked="" type="checkbox"/> None |  |
| 7                                 | Support for attending meetings and/or travel                                                          | <input checked="" type="checkbox"/> None |  |
| 8                                 | Patents planned, issued or pending                                                                    | <input checked="" type="checkbox"/> None |  |
| 9                                 | Participation on a Data Safety Monitoring Board or Advisory Board                                     | <input checked="" type="checkbox"/> None |  |
| 10                                | Leadership or fiduciary role in other board, society, committee or advocacy group, paid or            | <input checked="" type="checkbox"/> None |  |
| 11                                | Stock or stock options                                                                                | <input type="checkbox"/> None            |  |

|    |                                                                                  |                                          |  |
|----|----------------------------------------------------------------------------------|------------------------------------------|--|
|    |                                                                                  |                                          |  |
|    |                                                                                  |                                          |  |
| 12 | Receipt of equipment, materials, drugs, medical writing, gifts or other services | <input checked="" type="checkbox"/> None |  |
|    |                                                                                  |                                          |  |
| 13 | Other financial or non-financial interests                                       | <input checked="" type="checkbox"/> None |  |
|    |                                                                                  |                                          |  |

Please place an "X" next to the following statement to indicate your agreement:

I certify that I have answered every question and have not altered the wording of any of the questions on this form.

## ICMJE DISCLOSURE FORM

**Date:** 12/13/2023

**Your Name:** Michael W. Weiner

**Manuscript Title:** **A Cross-sectional Study of  $\alpha$ -Synuclein Seed Amplification Assay in Alzheimer's Disease Neuroimaging Initiative: Prevalence and Associations with Alzheimer's Disease Biomarkers and Cognitive Function**

**Manuscript Number (if known):** Click or tap here to enter text.

In the interest of transparency, we ask you to disclose all relationships/activities/interests listed below that are related to the content of your manuscript. "Related" means any relation with for-profit or not-for-profit third parties whose interests may be affected by the content of the manuscript. Disclosure represents a commitment to transparency and does not necessarily indicate a bias. If you are in doubt about whether to list a relationship/activity/interest, it is preferable that you do so.

The author's relationships/activities/interests should be defined broadly. For example, if your manuscript pertains to the epidemiology of hypertension, you should declare all relationships with manufacturers of antihypertensive medication, even if that medication is not mentioned in the manuscript.

In item #1 below, report all support for the work reported in this manuscript without time limit. For all other items, the time frame for disclosure is the past 36 months.

|                                                                        | Name all entities with whom you have this relationship or indicate none (add rows as needed)                                                                                   | Specifications/Comments (e.g., if payments were made to you or to your institution)                                                                                                                                                                                                                                                                                                                                                                                                                                                                                                                                                                                                                                                                                                                                                                                                                                                                                                                                                                                                                                                                                                                            |                            |                                       |                              |                                       |                                           |                                       |                            |                                       |                        |                                       |                             |                                       |                                                     |                                       |                                                                        |                                       |                                  |                                       |                                 |                                       |
|------------------------------------------------------------------------|--------------------------------------------------------------------------------------------------------------------------------------------------------------------------------|----------------------------------------------------------------------------------------------------------------------------------------------------------------------------------------------------------------------------------------------------------------------------------------------------------------------------------------------------------------------------------------------------------------------------------------------------------------------------------------------------------------------------------------------------------------------------------------------------------------------------------------------------------------------------------------------------------------------------------------------------------------------------------------------------------------------------------------------------------------------------------------------------------------------------------------------------------------------------------------------------------------------------------------------------------------------------------------------------------------------------------------------------------------------------------------------------------------|----------------------------|---------------------------------------|------------------------------|---------------------------------------|-------------------------------------------|---------------------------------------|----------------------------|---------------------------------------|------------------------|---------------------------------------|-----------------------------|---------------------------------------|-----------------------------------------------------|---------------------------------------|------------------------------------------------------------------------|---------------------------------------|----------------------------------|---------------------------------------|---------------------------------|---------------------------------------|
| Time frame: Since the initial planning of the work                     |                                                                                                                                                                                |                                                                                                                                                                                                                                                                                                                                                                                                                                                                                                                                                                                                                                                                                                                                                                                                                                                                                                                                                                                                                                                                                                                                                                                                                |                            |                                       |                              |                                       |                                           |                                       |                            |                                       |                        |                                       |                             |                                       |                                                     |                                       |                                                                        |                                       |                                  |                                       |                                 |                                       |
| <b>1</b>                                                               | All support for the present manuscript (e.g., funding, provision of study materials, medical writing, article processing charges, etc.)<br><b>No time limit for this item.</b> | <input type="checkbox"/> <b>None</b><br><table border="1" style="width: 100%; border-collapse: collapse; margin-top: 5px;"> <tr> <td style="width: 60%;">NIH Grant: 5R01AG058676-02</td> <td>Payments were made to my institution.</td> </tr> <tr> <td>NIH Grant: 2 U19 AG024904.16</td> <td>Payments were made to my institution.</td> </tr> <tr> <td colspan="2" style="text-align: right; color: #ccc;">Click the tab key to add additional rows.</td> </tr> </table>                                                                                                                                                                                                                                                                                                                                                                                                                                                                                                                                                                                                                                                                                                                                       | NIH Grant: 5R01AG058676-02 | Payments were made to my institution. | NIH Grant: 2 U19 AG024904.16 | Payments were made to my institution. | Click the tab key to add additional rows. |                                       |                            |                                       |                        |                                       |                             |                                       |                                                     |                                       |                                                                        |                                       |                                  |                                       |                                 |                                       |
| NIH Grant: 5R01AG058676-02                                             | Payments were made to my institution.                                                                                                                                          |                                                                                                                                                                                                                                                                                                                                                                                                                                                                                                                                                                                                                                                                                                                                                                                                                                                                                                                                                                                                                                                                                                                                                                                                                |                            |                                       |                              |                                       |                                           |                                       |                            |                                       |                        |                                       |                             |                                       |                                                     |                                       |                                                                        |                                       |                                  |                                       |                                 |                                       |
| NIH Grant: 2 U19 AG024904.16                                           | Payments were made to my institution.                                                                                                                                          |                                                                                                                                                                                                                                                                                                                                                                                                                                                                                                                                                                                                                                                                                                                                                                                                                                                                                                                                                                                                                                                                                                                                                                                                                |                            |                                       |                              |                                       |                                           |                                       |                            |                                       |                        |                                       |                             |                                       |                                                     |                                       |                                                                        |                                       |                                  |                                       |                                 |                                       |
| Click the tab key to add additional rows.                              |                                                                                                                                                                                |                                                                                                                                                                                                                                                                                                                                                                                                                                                                                                                                                                                                                                                                                                                                                                                                                                                                                                                                                                                                                                                                                                                                                                                                                |                            |                                       |                              |                                       |                                           |                                       |                            |                                       |                        |                                       |                             |                                       |                                                     |                                       |                                                                        |                                       |                                  |                                       |                                 |                                       |
| Time frame: past 36 months                                             |                                                                                                                                                                                |                                                                                                                                                                                                                                                                                                                                                                                                                                                                                                                                                                                                                                                                                                                                                                                                                                                                                                                                                                                                                                                                                                                                                                                                                |                            |                                       |                              |                                       |                                           |                                       |                            |                                       |                        |                                       |                             |                                       |                                                     |                                       |                                                                        |                                       |                                  |                                       |                                 |                                       |
| <b>2</b>                                                               | Grants or contracts from any entity (if not indicated in item #1 above).                                                                                                       | <input type="checkbox"/> <b>None</b><br><table border="1" style="width: 100%; border-collapse: collapse; margin-top: 5px;"> <tr> <td style="width: 60%;">NIH Grant: 5U2CAG060426-04</td> <td>Payments were made to my institution.</td> </tr> <tr> <td>NIH Grant: 1RF1AG059009-01</td> <td>Payments were made to my institution.</td> </tr> <tr> <td>NIH Grant: R33 AG062867</td> <td>Payments were made to my institution.</td> </tr> <tr> <td>NIH Grant: 1R01NS119651-01</td> <td>Payments were made to my institution.</td> </tr> <tr> <td>NIH Grant: RF1AG062196</td> <td>Payments were made to my institution.</td> </tr> <tr> <td>NIH Grant: R56AG075744-01A1</td> <td>Payments were made to my institution.</td> </tr> <tr> <td>Additional support from Department of Defense (DOD)</td> <td>Payments were made to my institution.</td> </tr> <tr> <td>Additional support from: California Department of Public Health (CDPH)</td> <td>Payments were made to my institution.</td> </tr> <tr> <td>Additional support from: Siemens</td> <td>Payments were made to my institution.</td> </tr> <tr> <td>Additional support from: Biogen</td> <td>Payments were made to my institution.</td> </tr> </table> | NIH Grant: 5U2CAG060426-04 | Payments were made to my institution. | NIH Grant: 1RF1AG059009-01   | Payments were made to my institution. | NIH Grant: R33 AG062867                   | Payments were made to my institution. | NIH Grant: 1R01NS119651-01 | Payments were made to my institution. | NIH Grant: RF1AG062196 | Payments were made to my institution. | NIH Grant: R56AG075744-01A1 | Payments were made to my institution. | Additional support from Department of Defense (DOD) | Payments were made to my institution. | Additional support from: California Department of Public Health (CDPH) | Payments were made to my institution. | Additional support from: Siemens | Payments were made to my institution. | Additional support from: Biogen | Payments were made to my institution. |
| NIH Grant: 5U2CAG060426-04                                             | Payments were made to my institution.                                                                                                                                          |                                                                                                                                                                                                                                                                                                                                                                                                                                                                                                                                                                                                                                                                                                                                                                                                                                                                                                                                                                                                                                                                                                                                                                                                                |                            |                                       |                              |                                       |                                           |                                       |                            |                                       |                        |                                       |                             |                                       |                                                     |                                       |                                                                        |                                       |                                  |                                       |                                 |                                       |
| NIH Grant: 1RF1AG059009-01                                             | Payments were made to my institution.                                                                                                                                          |                                                                                                                                                                                                                                                                                                                                                                                                                                                                                                                                                                                                                                                                                                                                                                                                                                                                                                                                                                                                                                                                                                                                                                                                                |                            |                                       |                              |                                       |                                           |                                       |                            |                                       |                        |                                       |                             |                                       |                                                     |                                       |                                                                        |                                       |                                  |                                       |                                 |                                       |
| NIH Grant: R33 AG062867                                                | Payments were made to my institution.                                                                                                                                          |                                                                                                                                                                                                                                                                                                                                                                                                                                                                                                                                                                                                                                                                                                                                                                                                                                                                                                                                                                                                                                                                                                                                                                                                                |                            |                                       |                              |                                       |                                           |                                       |                            |                                       |                        |                                       |                             |                                       |                                                     |                                       |                                                                        |                                       |                                  |                                       |                                 |                                       |
| NIH Grant: 1R01NS119651-01                                             | Payments were made to my institution.                                                                                                                                          |                                                                                                                                                                                                                                                                                                                                                                                                                                                                                                                                                                                                                                                                                                                                                                                                                                                                                                                                                                                                                                                                                                                                                                                                                |                            |                                       |                              |                                       |                                           |                                       |                            |                                       |                        |                                       |                             |                                       |                                                     |                                       |                                                                        |                                       |                                  |                                       |                                 |                                       |
| NIH Grant: RF1AG062196                                                 | Payments were made to my institution.                                                                                                                                          |                                                                                                                                                                                                                                                                                                                                                                                                                                                                                                                                                                                                                                                                                                                                                                                                                                                                                                                                                                                                                                                                                                                                                                                                                |                            |                                       |                              |                                       |                                           |                                       |                            |                                       |                        |                                       |                             |                                       |                                                     |                                       |                                                                        |                                       |                                  |                                       |                                 |                                       |
| NIH Grant: R56AG075744-01A1                                            | Payments were made to my institution.                                                                                                                                          |                                                                                                                                                                                                                                                                                                                                                                                                                                                                                                                                                                                                                                                                                                                                                                                                                                                                                                                                                                                                                                                                                                                                                                                                                |                            |                                       |                              |                                       |                                           |                                       |                            |                                       |                        |                                       |                             |                                       |                                                     |                                       |                                                                        |                                       |                                  |                                       |                                 |                                       |
| Additional support from Department of Defense (DOD)                    | Payments were made to my institution.                                                                                                                                          |                                                                                                                                                                                                                                                                                                                                                                                                                                                                                                                                                                                                                                                                                                                                                                                                                                                                                                                                                                                                                                                                                                                                                                                                                |                            |                                       |                              |                                       |                                           |                                       |                            |                                       |                        |                                       |                             |                                       |                                                     |                                       |                                                                        |                                       |                                  |                                       |                                 |                                       |
| Additional support from: California Department of Public Health (CDPH) | Payments were made to my institution.                                                                                                                                          |                                                                                                                                                                                                                                                                                                                                                                                                                                                                                                                                                                                                                                                                                                                                                                                                                                                                                                                                                                                                                                                                                                                                                                                                                |                            |                                       |                              |                                       |                                           |                                       |                            |                                       |                        |                                       |                             |                                       |                                                     |                                       |                                                                        |                                       |                                  |                                       |                                 |                                       |
| Additional support from: Siemens                                       | Payments were made to my institution.                                                                                                                                          |                                                                                                                                                                                                                                                                                                                                                                                                                                                                                                                                                                                                                                                                                                                                                                                                                                                                                                                                                                                                                                                                                                                                                                                                                |                            |                                       |                              |                                       |                                           |                                       |                            |                                       |                        |                                       |                             |                                       |                                                     |                                       |                                                                        |                                       |                                  |                                       |                                 |                                       |
| Additional support from: Biogen                                        | Payments were made to my institution.                                                                                                                                          |                                                                                                                                                                                                                                                                                                                                                                                                                                                                                                                                                                                                                                                                                                                                                                                                                                                                                                                                                                                                                                                                                                                                                                                                                |                            |                                       |                              |                                       |                                           |                                       |                            |                                       |                        |                                       |                             |                                       |                                                     |                                       |                                                                        |                                       |                                  |                                       |                                 |                                       |

|                                                                   |                                                                                                              | Name all entities with whom you have this relationship or indicate none (add rows as needed)                                                                                                                                                                                                                                                                                                                                                                                                                                                                                                                                                                                                                                                                                                                                                                                                                                                                                                                                                                                                                                                                                                                                                                                                                       | Specifications/Comments (e.g., if payments were made to you or to your institution) |                                       |                                                  |                                       |                                            |                                       |                                                    |                                       |                                                |                                       |                               |                                       |                                                                   |                                       |                                                |                                       |                                                  |                                       |                                                              |                                  |                                         |                                  |                 |                                  |                  |                                  |                                 |                                  |       |                                  |            |                                  |  |
|-------------------------------------------------------------------|--------------------------------------------------------------------------------------------------------------|--------------------------------------------------------------------------------------------------------------------------------------------------------------------------------------------------------------------------------------------------------------------------------------------------------------------------------------------------------------------------------------------------------------------------------------------------------------------------------------------------------------------------------------------------------------------------------------------------------------------------------------------------------------------------------------------------------------------------------------------------------------------------------------------------------------------------------------------------------------------------------------------------------------------------------------------------------------------------------------------------------------------------------------------------------------------------------------------------------------------------------------------------------------------------------------------------------------------------------------------------------------------------------------------------------------------|-------------------------------------------------------------------------------------|---------------------------------------|--------------------------------------------------|---------------------------------------|--------------------------------------------|---------------------------------------|----------------------------------------------------|---------------------------------------|------------------------------------------------|---------------------------------------|-------------------------------|---------------------------------------|-------------------------------------------------------------------|---------------------------------------|------------------------------------------------|---------------------------------------|--------------------------------------------------|---------------------------------------|--------------------------------------------------------------|----------------------------------|-----------------------------------------|----------------------------------|-----------------|----------------------------------|------------------|----------------------------------|---------------------------------|----------------------------------|-------|----------------------------------|------------|----------------------------------|--|
|                                                                   |                                                                                                              | <table border="1"> <tr><td>Additional support from: Hillblom Foundation</td><td>Payments were made to my institution.</td></tr> <tr><td>Additional support from: Alzheimer's Association</td><td>Payments were made to my institution.</td></tr> <tr><td>Additional support from: Johnson &amp; Johnson</td><td>Payments were made to my institution.</td></tr> <tr><td>Additional support from: Kevin and Connie Shanahan</td><td>Payments were made to my institution.</td></tr> <tr><td>Additional support from: GE</td><td>Payments were made to my institution.</td></tr> <tr><td>Additional support from: VUmc</td><td>Payments were made to my institution.</td></tr> <tr><td>Additional support from: Australian Catholic University (HBI-BHR)</td><td>Payments were made to my institution.</td></tr> <tr><td>Additional support from: The Stroke Foundation</td><td>Payments were made to my institution.</td></tr> <tr><td>Additional support from: Veterans Administration</td><td>Payments were made to my institution.</td></tr> </table>                                                                                                                                                                                                                                                            | Additional support from: Hillblom Foundation                                        | Payments were made to my institution. | Additional support from: Alzheimer's Association | Payments were made to my institution. | Additional support from: Johnson & Johnson | Payments were made to my institution. | Additional support from: Kevin and Connie Shanahan | Payments were made to my institution. | Additional support from: GE                    | Payments were made to my institution. | Additional support from: VUmc | Payments were made to my institution. | Additional support from: Australian Catholic University (HBI-BHR) | Payments were made to my institution. | Additional support from: The Stroke Foundation | Payments were made to my institution. | Additional support from: Veterans Administration | Payments were made to my institution. |                                                              |                                  |                                         |                                  |                 |                                  |                  |                                  |                                 |                                  |       |                                  |            |                                  |  |
| Additional support from: Hillblom Foundation                      | Payments were made to my institution.                                                                        |                                                                                                                                                                                                                                                                                                                                                                                                                                                                                                                                                                                                                                                                                                                                                                                                                                                                                                                                                                                                                                                                                                                                                                                                                                                                                                                    |                                                                                     |                                       |                                                  |                                       |                                            |                                       |                                                    |                                       |                                                |                                       |                               |                                       |                                                                   |                                       |                                                |                                       |                                                  |                                       |                                                              |                                  |                                         |                                  |                 |                                  |                  |                                  |                                 |                                  |       |                                  |            |                                  |  |
| Additional support from: Alzheimer's Association                  | Payments were made to my institution.                                                                        |                                                                                                                                                                                                                                                                                                                                                                                                                                                                                                                                                                                                                                                                                                                                                                                                                                                                                                                                                                                                                                                                                                                                                                                                                                                                                                                    |                                                                                     |                                       |                                                  |                                       |                                            |                                       |                                                    |                                       |                                                |                                       |                               |                                       |                                                                   |                                       |                                                |                                       |                                                  |                                       |                                                              |                                  |                                         |                                  |                 |                                  |                  |                                  |                                 |                                  |       |                                  |            |                                  |  |
| Additional support from: Johnson & Johnson                        | Payments were made to my institution.                                                                        |                                                                                                                                                                                                                                                                                                                                                                                                                                                                                                                                                                                                                                                                                                                                                                                                                                                                                                                                                                                                                                                                                                                                                                                                                                                                                                                    |                                                                                     |                                       |                                                  |                                       |                                            |                                       |                                                    |                                       |                                                |                                       |                               |                                       |                                                                   |                                       |                                                |                                       |                                                  |                                       |                                                              |                                  |                                         |                                  |                 |                                  |                  |                                  |                                 |                                  |       |                                  |            |                                  |  |
| Additional support from: Kevin and Connie Shanahan                | Payments were made to my institution.                                                                        |                                                                                                                                                                                                                                                                                                                                                                                                                                                                                                                                                                                                                                                                                                                                                                                                                                                                                                                                                                                                                                                                                                                                                                                                                                                                                                                    |                                                                                     |                                       |                                                  |                                       |                                            |                                       |                                                    |                                       |                                                |                                       |                               |                                       |                                                                   |                                       |                                                |                                       |                                                  |                                       |                                                              |                                  |                                         |                                  |                 |                                  |                  |                                  |                                 |                                  |       |                                  |            |                                  |  |
| Additional support from: GE                                       | Payments were made to my institution.                                                                        |                                                                                                                                                                                                                                                                                                                                                                                                                                                                                                                                                                                                                                                                                                                                                                                                                                                                                                                                                                                                                                                                                                                                                                                                                                                                                                                    |                                                                                     |                                       |                                                  |                                       |                                            |                                       |                                                    |                                       |                                                |                                       |                               |                                       |                                                                   |                                       |                                                |                                       |                                                  |                                       |                                                              |                                  |                                         |                                  |                 |                                  |                  |                                  |                                 |                                  |       |                                  |            |                                  |  |
| Additional support from: VUmc                                     | Payments were made to my institution.                                                                        |                                                                                                                                                                                                                                                                                                                                                                                                                                                                                                                                                                                                                                                                                                                                                                                                                                                                                                                                                                                                                                                                                                                                                                                                                                                                                                                    |                                                                                     |                                       |                                                  |                                       |                                            |                                       |                                                    |                                       |                                                |                                       |                               |                                       |                                                                   |                                       |                                                |                                       |                                                  |                                       |                                                              |                                  |                                         |                                  |                 |                                  |                  |                                  |                                 |                                  |       |                                  |            |                                  |  |
| Additional support from: Australian Catholic University (HBI-BHR) | Payments were made to my institution.                                                                        |                                                                                                                                                                                                                                                                                                                                                                                                                                                                                                                                                                                                                                                                                                                                                                                                                                                                                                                                                                                                                                                                                                                                                                                                                                                                                                                    |                                                                                     |                                       |                                                  |                                       |                                            |                                       |                                                    |                                       |                                                |                                       |                               |                                       |                                                                   |                                       |                                                |                                       |                                                  |                                       |                                                              |                                  |                                         |                                  |                 |                                  |                  |                                  |                                 |                                  |       |                                  |            |                                  |  |
| Additional support from: The Stroke Foundation                    | Payments were made to my institution.                                                                        |                                                                                                                                                                                                                                                                                                                                                                                                                                                                                                                                                                                                                                                                                                                                                                                                                                                                                                                                                                                                                                                                                                                                                                                                                                                                                                                    |                                                                                     |                                       |                                                  |                                       |                                            |                                       |                                                    |                                       |                                                |                                       |                               |                                       |                                                                   |                                       |                                                |                                       |                                                  |                                       |                                                              |                                  |                                         |                                  |                 |                                  |                  |                                  |                                 |                                  |       |                                  |            |                                  |  |
| Additional support from: Veterans Administration                  | Payments were made to my institution.                                                                        |                                                                                                                                                                                                                                                                                                                                                                                                                                                                                                                                                                                                                                                                                                                                                                                                                                                                                                                                                                                                                                                                                                                                                                                                                                                                                                                    |                                                                                     |                                       |                                                  |                                       |                                            |                                       |                                                    |                                       |                                                |                                       |                               |                                       |                                                                   |                                       |                                                |                                       |                                                  |                                       |                                                              |                                  |                                         |                                  |                 |                                  |                  |                                  |                                 |                                  |       |                                  |            |                                  |  |
| 3                                                                 | Royalties or licenses                                                                                        | <input checked="" type="checkbox"/> <b>None</b> <table border="1"> <tr><td></td><td></td></tr> <tr><td></td><td></td></tr> <tr><td></td><td></td></tr> </table>                                                                                                                                                                                                                                                                                                                                                                                                                                                                                                                                                                                                                                                                                                                                                                                                                                                                                                                                                                                                                                                                                                                                                    |                                                                                     |                                       |                                                  |                                       |                                            |                                       |                                                    |                                       |                                                |                                       |                               |                                       |                                                                   |                                       |                                                |                                       |                                                  |                                       |                                                              |                                  |                                         |                                  |                 |                                  |                  |                                  |                                 |                                  |       |                                  |            |                                  |  |
|                                                                   |                                                                                                              |                                                                                                                                                                                                                                                                                                                                                                                                                                                                                                                                                                                                                                                                                                                                                                                                                                                                                                                                                                                                                                                                                                                                                                                                                                                                                                                    |                                                                                     |                                       |                                                  |                                       |                                            |                                       |                                                    |                                       |                                                |                                       |                               |                                       |                                                                   |                                       |                                                |                                       |                                                  |                                       |                                                              |                                  |                                         |                                  |                 |                                  |                  |                                  |                                 |                                  |       |                                  |            |                                  |  |
|                                                                   |                                                                                                              |                                                                                                                                                                                                                                                                                                                                                                                                                                                                                                                                                                                                                                                                                                                                                                                                                                                                                                                                                                                                                                                                                                                                                                                                                                                                                                                    |                                                                                     |                                       |                                                  |                                       |                                            |                                       |                                                    |                                       |                                                |                                       |                               |                                       |                                                                   |                                       |                                                |                                       |                                                  |                                       |                                                              |                                  |                                         |                                  |                 |                                  |                  |                                  |                                 |                                  |       |                                  |            |                                  |  |
|                                                                   |                                                                                                              |                                                                                                                                                                                                                                                                                                                                                                                                                                                                                                                                                                                                                                                                                                                                                                                                                                                                                                                                                                                                                                                                                                                                                                                                                                                                                                                    |                                                                                     |                                       |                                                  |                                       |                                            |                                       |                                                    |                                       |                                                |                                       |                               |                                       |                                                                   |                                       |                                                |                                       |                                                  |                                       |                                                              |                                  |                                         |                                  |                 |                                  |                  |                                  |                                 |                                  |       |                                  |            |                                  |  |
| 4                                                                 | Consulting fees                                                                                              | <input type="checkbox"/> <b>None</b> <table border="1"> <tr><td>Boxer Capital</td><td>Payment was made directly to me.</td></tr> <tr><td>Cerecin</td><td>Payment was made directly to me.</td></tr> <tr><td>Clario/BioClinica</td><td>Payment was made directly to me.</td></tr> <tr><td>Dementia Society of Japan</td><td>Payment was made directly to me.</td></tr> <tr><td>Eisai</td><td>Payment was made directly to me.</td></tr> <tr><td>Guidepoint</td><td>Payment was made directly to me.</td></tr> <tr><td>Health and Wellness Partners</td><td>Payment was made directly to me.</td></tr> <tr><td>Indiana U.</td><td>Payment was made directly to me.</td></tr> <tr><td>LCN Consulting</td><td>Payment was made directly to me.</td></tr> <tr><td>Merck Sharp &amp; Dohme Corp.</td><td>Payment was made directly to me.</td></tr> <tr><td>Duke U.</td><td>Payment was made directly to me.</td></tr> <tr><td>Prova Education</td><td>Payment was made directly to me.</td></tr> <tr><td>T3D Therapeutics</td><td>Payment was made directly to me.</td></tr> <tr><td>University of Southern CA (USC)</td><td>Payment was made directly to me.</td></tr> <tr><td>WebMD</td><td>Payment was made directly to me.</td></tr> <tr><td>MEDA Corp.</td><td>Payment was made directly to me.</td></tr> </table> | Boxer Capital                                                                       | Payment was made directly to me.      | Cerecin                                          | Payment was made directly to me.      | Clario/BioClinica                          | Payment was made directly to me.      | Dementia Society of Japan                          | Payment was made directly to me.      | Eisai                                          | Payment was made directly to me.      | Guidepoint                    | Payment was made directly to me.      | Health and Wellness Partners                                      | Payment was made directly to me.      | Indiana U.                                     | Payment was made directly to me.      | LCN Consulting                                   | Payment was made directly to me.      | Merck Sharp & Dohme Corp.                                    | Payment was made directly to me. | Duke U.                                 | Payment was made directly to me. | Prova Education | Payment was made directly to me. | T3D Therapeutics | Payment was made directly to me. | University of Southern CA (USC) | Payment was made directly to me. | WebMD | Payment was made directly to me. | MEDA Corp. | Payment was made directly to me. |  |
| Boxer Capital                                                     | Payment was made directly to me.                                                                             |                                                                                                                                                                                                                                                                                                                                                                                                                                                                                                                                                                                                                                                                                                                                                                                                                                                                                                                                                                                                                                                                                                                                                                                                                                                                                                                    |                                                                                     |                                       |                                                  |                                       |                                            |                                       |                                                    |                                       |                                                |                                       |                               |                                       |                                                                   |                                       |                                                |                                       |                                                  |                                       |                                                              |                                  |                                         |                                  |                 |                                  |                  |                                  |                                 |                                  |       |                                  |            |                                  |  |
| Cerecin                                                           | Payment was made directly to me.                                                                             |                                                                                                                                                                                                                                                                                                                                                                                                                                                                                                                                                                                                                                                                                                                                                                                                                                                                                                                                                                                                                                                                                                                                                                                                                                                                                                                    |                                                                                     |                                       |                                                  |                                       |                                            |                                       |                                                    |                                       |                                                |                                       |                               |                                       |                                                                   |                                       |                                                |                                       |                                                  |                                       |                                                              |                                  |                                         |                                  |                 |                                  |                  |                                  |                                 |                                  |       |                                  |            |                                  |  |
| Clario/BioClinica                                                 | Payment was made directly to me.                                                                             |                                                                                                                                                                                                                                                                                                                                                                                                                                                                                                                                                                                                                                                                                                                                                                                                                                                                                                                                                                                                                                                                                                                                                                                                                                                                                                                    |                                                                                     |                                       |                                                  |                                       |                                            |                                       |                                                    |                                       |                                                |                                       |                               |                                       |                                                                   |                                       |                                                |                                       |                                                  |                                       |                                                              |                                  |                                         |                                  |                 |                                  |                  |                                  |                                 |                                  |       |                                  |            |                                  |  |
| Dementia Society of Japan                                         | Payment was made directly to me.                                                                             |                                                                                                                                                                                                                                                                                                                                                                                                                                                                                                                                                                                                                                                                                                                                                                                                                                                                                                                                                                                                                                                                                                                                                                                                                                                                                                                    |                                                                                     |                                       |                                                  |                                       |                                            |                                       |                                                    |                                       |                                                |                                       |                               |                                       |                                                                   |                                       |                                                |                                       |                                                  |                                       |                                                              |                                  |                                         |                                  |                 |                                  |                  |                                  |                                 |                                  |       |                                  |            |                                  |  |
| Eisai                                                             | Payment was made directly to me.                                                                             |                                                                                                                                                                                                                                                                                                                                                                                                                                                                                                                                                                                                                                                                                                                                                                                                                                                                                                                                                                                                                                                                                                                                                                                                                                                                                                                    |                                                                                     |                                       |                                                  |                                       |                                            |                                       |                                                    |                                       |                                                |                                       |                               |                                       |                                                                   |                                       |                                                |                                       |                                                  |                                       |                                                              |                                  |                                         |                                  |                 |                                  |                  |                                  |                                 |                                  |       |                                  |            |                                  |  |
| Guidepoint                                                        | Payment was made directly to me.                                                                             |                                                                                                                                                                                                                                                                                                                                                                                                                                                                                                                                                                                                                                                                                                                                                                                                                                                                                                                                                                                                                                                                                                                                                                                                                                                                                                                    |                                                                                     |                                       |                                                  |                                       |                                            |                                       |                                                    |                                       |                                                |                                       |                               |                                       |                                                                   |                                       |                                                |                                       |                                                  |                                       |                                                              |                                  |                                         |                                  |                 |                                  |                  |                                  |                                 |                                  |       |                                  |            |                                  |  |
| Health and Wellness Partners                                      | Payment was made directly to me.                                                                             |                                                                                                                                                                                                                                                                                                                                                                                                                                                                                                                                                                                                                                                                                                                                                                                                                                                                                                                                                                                                                                                                                                                                                                                                                                                                                                                    |                                                                                     |                                       |                                                  |                                       |                                            |                                       |                                                    |                                       |                                                |                                       |                               |                                       |                                                                   |                                       |                                                |                                       |                                                  |                                       |                                                              |                                  |                                         |                                  |                 |                                  |                  |                                  |                                 |                                  |       |                                  |            |                                  |  |
| Indiana U.                                                        | Payment was made directly to me.                                                                             |                                                                                                                                                                                                                                                                                                                                                                                                                                                                                                                                                                                                                                                                                                                                                                                                                                                                                                                                                                                                                                                                                                                                                                                                                                                                                                                    |                                                                                     |                                       |                                                  |                                       |                                            |                                       |                                                    |                                       |                                                |                                       |                               |                                       |                                                                   |                                       |                                                |                                       |                                                  |                                       |                                                              |                                  |                                         |                                  |                 |                                  |                  |                                  |                                 |                                  |       |                                  |            |                                  |  |
| LCN Consulting                                                    | Payment was made directly to me.                                                                             |                                                                                                                                                                                                                                                                                                                                                                                                                                                                                                                                                                                                                                                                                                                                                                                                                                                                                                                                                                                                                                                                                                                                                                                                                                                                                                                    |                                                                                     |                                       |                                                  |                                       |                                            |                                       |                                                    |                                       |                                                |                                       |                               |                                       |                                                                   |                                       |                                                |                                       |                                                  |                                       |                                                              |                                  |                                         |                                  |                 |                                  |                  |                                  |                                 |                                  |       |                                  |            |                                  |  |
| Merck Sharp & Dohme Corp.                                         | Payment was made directly to me.                                                                             |                                                                                                                                                                                                                                                                                                                                                                                                                                                                                                                                                                                                                                                                                                                                                                                                                                                                                                                                                                                                                                                                                                                                                                                                                                                                                                                    |                                                                                     |                                       |                                                  |                                       |                                            |                                       |                                                    |                                       |                                                |                                       |                               |                                       |                                                                   |                                       |                                                |                                       |                                                  |                                       |                                                              |                                  |                                         |                                  |                 |                                  |                  |                                  |                                 |                                  |       |                                  |            |                                  |  |
| Duke U.                                                           | Payment was made directly to me.                                                                             |                                                                                                                                                                                                                                                                                                                                                                                                                                                                                                                                                                                                                                                                                                                                                                                                                                                                                                                                                                                                                                                                                                                                                                                                                                                                                                                    |                                                                                     |                                       |                                                  |                                       |                                            |                                       |                                                    |                                       |                                                |                                       |                               |                                       |                                                                   |                                       |                                                |                                       |                                                  |                                       |                                                              |                                  |                                         |                                  |                 |                                  |                  |                                  |                                 |                                  |       |                                  |            |                                  |  |
| Prova Education                                                   | Payment was made directly to me.                                                                             |                                                                                                                                                                                                                                                                                                                                                                                                                                                                                                                                                                                                                                                                                                                                                                                                                                                                                                                                                                                                                                                                                                                                                                                                                                                                                                                    |                                                                                     |                                       |                                                  |                                       |                                            |                                       |                                                    |                                       |                                                |                                       |                               |                                       |                                                                   |                                       |                                                |                                       |                                                  |                                       |                                                              |                                  |                                         |                                  |                 |                                  |                  |                                  |                                 |                                  |       |                                  |            |                                  |  |
| T3D Therapeutics                                                  | Payment was made directly to me.                                                                             |                                                                                                                                                                                                                                                                                                                                                                                                                                                                                                                                                                                                                                                                                                                                                                                                                                                                                                                                                                                                                                                                                                                                                                                                                                                                                                                    |                                                                                     |                                       |                                                  |                                       |                                            |                                       |                                                    |                                       |                                                |                                       |                               |                                       |                                                                   |                                       |                                                |                                       |                                                  |                                       |                                                              |                                  |                                         |                                  |                 |                                  |                  |                                  |                                 |                                  |       |                                  |            |                                  |  |
| University of Southern CA (USC)                                   | Payment was made directly to me.                                                                             |                                                                                                                                                                                                                                                                                                                                                                                                                                                                                                                                                                                                                                                                                                                                                                                                                                                                                                                                                                                                                                                                                                                                                                                                                                                                                                                    |                                                                                     |                                       |                                                  |                                       |                                            |                                       |                                                    |                                       |                                                |                                       |                               |                                       |                                                                   |                                       |                                                |                                       |                                                  |                                       |                                                              |                                  |                                         |                                  |                 |                                  |                  |                                  |                                 |                                  |       |                                  |            |                                  |  |
| WebMD                                                             | Payment was made directly to me.                                                                             |                                                                                                                                                                                                                                                                                                                                                                                                                                                                                                                                                                                                                                                                                                                                                                                                                                                                                                                                                                                                                                                                                                                                                                                                                                                                                                                    |                                                                                     |                                       |                                                  |                                       |                                            |                                       |                                                    |                                       |                                                |                                       |                               |                                       |                                                                   |                                       |                                                |                                       |                                                  |                                       |                                                              |                                  |                                         |                                  |                 |                                  |                  |                                  |                                 |                                  |       |                                  |            |                                  |  |
| MEDA Corp.                                                        | Payment was made directly to me.                                                                             |                                                                                                                                                                                                                                                                                                                                                                                                                                                                                                                                                                                                                                                                                                                                                                                                                                                                                                                                                                                                                                                                                                                                                                                                                                                                                                                    |                                                                                     |                                       |                                                  |                                       |                                            |                                       |                                                    |                                       |                                                |                                       |                               |                                       |                                                                   |                                       |                                                |                                       |                                                  |                                       |                                                              |                                  |                                         |                                  |                 |                                  |                  |                                  |                                 |                                  |       |                                  |            |                                  |  |
| 5                                                                 | Payment or honoraria for lectures, presentations, speakers bureaus, manuscript writing or educational events | <input type="checkbox"/> <b>None</b> <table border="1"> <tr><td>China Association for Alzheimer's Disease (CAAD)</td><td>Payment was made directly to me.</td></tr> <tr><td>Taipei Medical University</td><td>Payment was made directly to me.</td></tr> <tr><td>Cleveland Clinic</td><td>Payment was made directly to me.</td></tr> <tr><td>AD/PD Congress</td><td>Payment was made directly to me.</td></tr> <tr><td>Foundation of Learning; Health Society (Japan)</td><td>Payment was made directly to me.</td></tr> <tr><td>INSPIRE Project; U. Toulouse</td><td>Payment was made directly to me.</td></tr> <tr><td>Japan Society for Dementia Research</td><td>Payment was made directly to me.</td></tr> <tr><td>Korean Dementia Society</td><td>Payment was made directly to me.</td></tr> <tr><td>Merck Sharp &amp; Dohme Corp.,</td><td>Payment was made directly to me.</td></tr> <tr><td>National Center for Geriatrics and Gerontology (NCGG; Japan)</td><td>Payment was made directly to me.</td></tr> <tr><td>University of Southern California (USC)</td><td>Payment was made directly to me.</td></tr> </table>                                                                                                                                                                                   | China Association for Alzheimer's Disease (CAAD)                                    | Payment was made directly to me.      | Taipei Medical University                        | Payment was made directly to me.      | Cleveland Clinic                           | Payment was made directly to me.      | AD/PD Congress                                     | Payment was made directly to me.      | Foundation of Learning; Health Society (Japan) | Payment was made directly to me.      | INSPIRE Project; U. Toulouse  | Payment was made directly to me.      | Japan Society for Dementia Research                               | Payment was made directly to me.      | Korean Dementia Society                        | Payment was made directly to me.      | Merck Sharp & Dohme Corp.,                       | Payment was made directly to me.      | National Center for Geriatrics and Gerontology (NCGG; Japan) | Payment was made directly to me. | University of Southern California (USC) | Payment was made directly to me. |                 |                                  |                  |                                  |                                 |                                  |       |                                  |            |                                  |  |
| China Association for Alzheimer's Disease (CAAD)                  | Payment was made directly to me.                                                                             |                                                                                                                                                                                                                                                                                                                                                                                                                                                                                                                                                                                                                                                                                                                                                                                                                                                                                                                                                                                                                                                                                                                                                                                                                                                                                                                    |                                                                                     |                                       |                                                  |                                       |                                            |                                       |                                                    |                                       |                                                |                                       |                               |                                       |                                                                   |                                       |                                                |                                       |                                                  |                                       |                                                              |                                  |                                         |                                  |                 |                                  |                  |                                  |                                 |                                  |       |                                  |            |                                  |  |
| Taipei Medical University                                         | Payment was made directly to me.                                                                             |                                                                                                                                                                                                                                                                                                                                                                                                                                                                                                                                                                                                                                                                                                                                                                                                                                                                                                                                                                                                                                                                                                                                                                                                                                                                                                                    |                                                                                     |                                       |                                                  |                                       |                                            |                                       |                                                    |                                       |                                                |                                       |                               |                                       |                                                                   |                                       |                                                |                                       |                                                  |                                       |                                                              |                                  |                                         |                                  |                 |                                  |                  |                                  |                                 |                                  |       |                                  |            |                                  |  |
| Cleveland Clinic                                                  | Payment was made directly to me.                                                                             |                                                                                                                                                                                                                                                                                                                                                                                                                                                                                                                                                                                                                                                                                                                                                                                                                                                                                                                                                                                                                                                                                                                                                                                                                                                                                                                    |                                                                                     |                                       |                                                  |                                       |                                            |                                       |                                                    |                                       |                                                |                                       |                               |                                       |                                                                   |                                       |                                                |                                       |                                                  |                                       |                                                              |                                  |                                         |                                  |                 |                                  |                  |                                  |                                 |                                  |       |                                  |            |                                  |  |
| AD/PD Congress                                                    | Payment was made directly to me.                                                                             |                                                                                                                                                                                                                                                                                                                                                                                                                                                                                                                                                                                                                                                                                                                                                                                                                                                                                                                                                                                                                                                                                                                                                                                                                                                                                                                    |                                                                                     |                                       |                                                  |                                       |                                            |                                       |                                                    |                                       |                                                |                                       |                               |                                       |                                                                   |                                       |                                                |                                       |                                                  |                                       |                                                              |                                  |                                         |                                  |                 |                                  |                  |                                  |                                 |                                  |       |                                  |            |                                  |  |
| Foundation of Learning; Health Society (Japan)                    | Payment was made directly to me.                                                                             |                                                                                                                                                                                                                                                                                                                                                                                                                                                                                                                                                                                                                                                                                                                                                                                                                                                                                                                                                                                                                                                                                                                                                                                                                                                                                                                    |                                                                                     |                                       |                                                  |                                       |                                            |                                       |                                                    |                                       |                                                |                                       |                               |                                       |                                                                   |                                       |                                                |                                       |                                                  |                                       |                                                              |                                  |                                         |                                  |                 |                                  |                  |                                  |                                 |                                  |       |                                  |            |                                  |  |
| INSPIRE Project; U. Toulouse                                      | Payment was made directly to me.                                                                             |                                                                                                                                                                                                                                                                                                                                                                                                                                                                                                                                                                                                                                                                                                                                                                                                                                                                                                                                                                                                                                                                                                                                                                                                                                                                                                                    |                                                                                     |                                       |                                                  |                                       |                                            |                                       |                                                    |                                       |                                                |                                       |                               |                                       |                                                                   |                                       |                                                |                                       |                                                  |                                       |                                                              |                                  |                                         |                                  |                 |                                  |                  |                                  |                                 |                                  |       |                                  |            |                                  |  |
| Japan Society for Dementia Research                               | Payment was made directly to me.                                                                             |                                                                                                                                                                                                                                                                                                                                                                                                                                                                                                                                                                                                                                                                                                                                                                                                                                                                                                                                                                                                                                                                                                                                                                                                                                                                                                                    |                                                                                     |                                       |                                                  |                                       |                                            |                                       |                                                    |                                       |                                                |                                       |                               |                                       |                                                                   |                                       |                                                |                                       |                                                  |                                       |                                                              |                                  |                                         |                                  |                 |                                  |                  |                                  |                                 |                                  |       |                                  |            |                                  |  |
| Korean Dementia Society                                           | Payment was made directly to me.                                                                             |                                                                                                                                                                                                                                                                                                                                                                                                                                                                                                                                                                                                                                                                                                                                                                                                                                                                                                                                                                                                                                                                                                                                                                                                                                                                                                                    |                                                                                     |                                       |                                                  |                                       |                                            |                                       |                                                    |                                       |                                                |                                       |                               |                                       |                                                                   |                                       |                                                |                                       |                                                  |                                       |                                                              |                                  |                                         |                                  |                 |                                  |                  |                                  |                                 |                                  |       |                                  |            |                                  |  |
| Merck Sharp & Dohme Corp.,                                        | Payment was made directly to me.                                                                             |                                                                                                                                                                                                                                                                                                                                                                                                                                                                                                                                                                                                                                                                                                                                                                                                                                                                                                                                                                                                                                                                                                                                                                                                                                                                                                                    |                                                                                     |                                       |                                                  |                                       |                                            |                                       |                                                    |                                       |                                                |                                       |                               |                                       |                                                                   |                                       |                                                |                                       |                                                  |                                       |                                                              |                                  |                                         |                                  |                 |                                  |                  |                                  |                                 |                                  |       |                                  |            |                                  |  |
| National Center for Geriatrics and Gerontology (NCGG; Japan)      | Payment was made directly to me.                                                                             |                                                                                                                                                                                                                                                                                                                                                                                                                                                                                                                                                                                                                                                                                                                                                                                                                                                                                                                                                                                                                                                                                                                                                                                                                                                                                                                    |                                                                                     |                                       |                                                  |                                       |                                            |                                       |                                                    |                                       |                                                |                                       |                               |                                       |                                                                   |                                       |                                                |                                       |                                                  |                                       |                                                              |                                  |                                         |                                  |                 |                                  |                  |                                  |                                 |                                  |       |                                  |            |                                  |  |
| University of Southern California (USC)                           | Payment was made directly to me.                                                                             |                                                                                                                                                                                                                                                                                                                                                                                                                                                                                                                                                                                                                                                                                                                                                                                                                                                                                                                                                                                                                                                                                                                                                                                                                                                                                                                    |                                                                                     |                                       |                                                  |                                       |                                            |                                       |                                                    |                                       |                                                |                                       |                               |                                       |                                                                   |                                       |                                                |                                       |                                                  |                                       |                                                              |                                  |                                         |                                  |                 |                                  |                  |                                  |                                 |                                  |       |                                  |            |                                  |  |

|    |                                                                                                   | Name all entities with whom you have this relationship or indicate none (add rows as needed) | Specifications/Comments (e.g., if payments were made to you or to your institution)          |
|----|---------------------------------------------------------------------------------------------------|----------------------------------------------------------------------------------------------|----------------------------------------------------------------------------------------------|
| 6  | Payment for expert testimony                                                                      | <input checked="" type="checkbox"/> None                                                     |                                                                                              |
|    |                                                                                                   |                                                                                              |                                                                                              |
|    |                                                                                                   |                                                                                              |                                                                                              |
| 7  | Support for attending meetings and/or travel                                                      | <input type="checkbox"/> None                                                                |                                                                                              |
|    |                                                                                                   | AD/PD Congress                                                                               | Payment was made either directly to the travel accommodations provider, or reimbursed to me. |
|    |                                                                                                   | Cleveland Clinic                                                                             | Payment was made either directly to the travel accommodations provider, or reimbursed to me. |
|    |                                                                                                   | CTAD Congress                                                                                | Payment was made either directly to the travel accommodations provider, or reimbursed to me. |
|    |                                                                                                   | Foundation of Learning; Health Society (Japan)                                               | Payment was made either directly to the travel accommodations provider, or reimbursed to me. |
|    |                                                                                                   | INSPIRE Project; U. Toulouse                                                                 | Payment was made either directly to the travel accommodations provider, or reimbursed to me. |
|    |                                                                                                   | Japan Society for Dementia Research                                                          | Payment was made either directly to the travel accommodations provider, or reimbursed to me. |
|    |                                                                                                   | Korean Dementia Society                                                                      | Payment was made either directly to the travel accommodations provider, or reimbursed to me. |
|    |                                                                                                   | Merck Sharp & Dohme Corp.,                                                                   | Payment was made either directly to the travel accommodations provider, or reimbursed to me. |
|    |                                                                                                   | National Center for Geriatrics and Gerontology (NCGG; Japan)                                 | Payment was made either directly to the travel accommodations provider, or reimbursed to me. |
|    |                                                                                                   | University of Southern California (USC)                                                      | Payment was made either directly to the travel accommodations provider, or reimbursed to me. |
| 8  | Patents planned, issued or pending                                                                | <input checked="" type="checkbox"/> None                                                     |                                                                                              |
|    |                                                                                                   |                                                                                              |                                                                                              |
|    |                                                                                                   |                                                                                              |                                                                                              |
| 9  | Participation on a Data Safety Monitoring Board or Advisory Board                                 | <input type="checkbox"/> None                                                                |                                                                                              |
|    |                                                                                                   | ADNI Scientific Advisory Board                                                               | Leadership                                                                                   |
|    |                                                                                                   | UCSF Committee for Human Research                                                            | Committee Member                                                                             |
|    |                                                                                                   |                                                                                              |                                                                                              |
|    |                                                                                                   |                                                                                              |                                                                                              |
| 10 | Leadership or fiduciary role in other board, society, committee or advocacy group, paid or unpaid | <input type="checkbox"/> None                                                                |                                                                                              |
|    |                                                                                                   | UCSF Inclusion Diversity Equity & Awareness Committee                                        | Leadership                                                                                   |
|    |                                                                                                   | Diversity Task Force of the Alzheimer's Disease Neuroimaging Initiative (ADNI)               | Leadership                                                                                   |

|    |                                                                                  | Name all entities with whom you have this relationship or indicate none (add rows as needed) | Specifications/Comments (e.g., if payments were made to you or to your institution) |
|----|----------------------------------------------------------------------------------|----------------------------------------------------------------------------------------------|-------------------------------------------------------------------------------------|
| 11 | Stock or stock options                                                           | <input type="checkbox"/> None                                                                |                                                                                     |
|    |                                                                                  | Alzeca                                                                                       | Stock options held.                                                                 |
|    |                                                                                  | Alzheon, Inc.                                                                                | Stock options held.                                                                 |
|    |                                                                                  | ALZPath                                                                                      | Stock options held.                                                                 |
|    |                                                                                  | Anven                                                                                        | Stock options held.                                                                 |
| 12 | Receipt of equipment, materials, drugs, medical writing, gifts or other services | <input checked="" type="checkbox"/> None                                                     |                                                                                     |
|    |                                                                                  |                                                                                              |                                                                                     |
|    |                                                                                  |                                                                                              |                                                                                     |
|    |                                                                                  |                                                                                              |                                                                                     |
| 13 | Other financial or non-financial interests                                       | <input checked="" type="checkbox"/> None                                                     |                                                                                     |
|    |                                                                                  |                                                                                              |                                                                                     |
|    |                                                                                  |                                                                                              |                                                                                     |
|    |                                                                                  |                                                                                              |                                                                                     |

Please place an "X" next to the following statement to indicate your agreement:

I certify that I have answered every question and have not altered the wording of any of the questions on this form.
